# Supplementary material for: miR-154 Influences HNSCC Development and Progression through Regulation of the Epithelial-to-Mesenchymal Transition Process and Could Be Used as a Potential Biomarker
Source: MDPI journal article supplement (doi:10.3390/biomedicines9121894), 2021-12-13
Supplement: s1 [file s1]

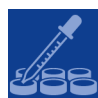

**Table S1.** List of processes based on the GSEA analysis of MSigDB gene sets enriched in HNSCC patients with lower and higher levels of *miR-154-5p* in all localization as well as depending on the localization in oral cavity, larynx or pharynx. Only gene sets with nominal  $p < 0.05$  were presented; SIZE - number of enriched genes in specified process, ES - enrichment score, NES - normalized enrichment score, FDR q-val - false discovery rate.

|                   | NAME                                               | SIZE | ES         | NES        | p-val        | FDR q-val   |
|-------------------|----------------------------------------------------|------|------------|------------|--------------|-------------|
| Localization      | <b>patients with low expression of miR-154-5p</b>  |      |            |            |              |             |
|                   | SINGH_KRAS_DEPENDENT_SIGNATURE                     | 20   | -0.700524  | -1.5727571 | 0.08045977   | 0.663567    |
|                   | TBK1.DF_DN                                         | 258  | -0.4619756 | -1.56569   | 0.054054055  | 0.34981143  |
| All localizations | <b>patients with high expression of miR-154-5p</b> |      |            |            |              |             |
|                   | AKT_UP.V1_DN                                       | 179  | 0.5298579  | 2.0809271  | 0.0          | 0.010224129 |
|                   | AKT_UP_MTOR_DN.V1_DN                               | 177  | 0.42670274 | 1.8757594  | 0.0          | 0.093307704 |
|                   | MTOR_UP.V1_DN                                      | 170  | 0.44283426 | 1.8146863  | 0.0          | 0.0974028   |
|                   | ESC_J1_UP_EARLY.V1_DN                              | 158  | 0.35960007 | 1.6201601  | 0.0019607844 | 0.18996853  |
|                   | CRX_DN.V1_DN                                       | 127  | 0.44080538 | 1.7359952  | 0.003992016  | 0.13988577  |
|                   | GCNP_SHH_UP_LATE.V1_DN                             | 168  | 0.36878064 | 1.6192702  | 0.004008016  | 0.17715292  |
|                   | ESC_V6.5_UP_EARLY.V1_DN                            | 153  | 0.50741667 | 1.8727603  | 0.0040650405 | 0.06392599  |
|                   | JNK_DN.V1_DN                                       | 174  | 0.4444347  | 1.7508625  | 0.00407332   | 0.14491369  |
|                   | CYCLIN_D1_UP.V1_UP                                 | 178  | 0.38466176 | 1.6065778  | 0.0058708414 | 0.16989867  |
|                   | GLI1_UP.V1_UP                                      | 21   | 0.51938635 | 1.6415216  | 0.009578544  | 0.23385362  |
|                   | CAHOY_ASTROGLIAL                                   | 91   | 0.47678348 | 1.7227652  | 0.009652509  | 0.13629018  |
|                   | CAHOY_OLIGODENDROCYTIC                             | 85   | 0.38774285 | 1.5628906  | 0.01775148   | 0.16555104  |
|                   | LEF1_UP.V1_UP                                      | 186  | 0.43609655 | 1.6494541  | 0.018832391  | 0.24566129  |
|                   | KRAS.600.LUNG.BREAST_UP.V1_UP                      | 267  | 0.3913184  | 1.6114745  | 0.019723866  | 0.17489475  |
|                   | NRL_DN.V1_DN                                       | 121  | 0.35250053 | 1.5266105  | 0.021611001  | 0.17696068  |
|                   | EIF4E_UP                                           | 88   | 0.4670218  | 1.6271266  | 0.021782178  | 0.1955343   |

|                                            |     |            |           |              |             |
|--------------------------------------------|-----|------------|-----------|--------------|-------------|
| BMI1_DN_MEL18_DN.V1_DN                     | 137 | 0.4354125  | 1.6353568 | 0.024809161  | 0.2210591   |
| CTIP_DN.V1_UP                              | 120 | 0.42776752 | 1.5839401 | 0.026119404  | 0.15453193  |
| PKCA_DN.V1_DN                              | 146 | 0.34221587 | 1.4658694 | 0.029239766  | 0.20648196  |
| KRAS.50_UP.V1_UP                           | 47  | 0.49730524 | 1.6009626 | 0.031311154  | 0.16576183  |
| CRX_NRL_DN.V1_DN                           | 111 | 0.35360312 | 1.4673762 | 0.03206413   | 0.2162339   |
| KRAS.AMP.LUNG_UP.V1_UP                     | 130 | 0.40797198 | 1.5366397 | 0.03265306   | 0.17746533  |
| WNT_UP.V1_UP                               | 169 | 0.3281619  | 1.4002154 | 0.033203125  | 0.23158869  |
| RB_P130_DN.V1_UP                           | 116 | 0.41796416 | 1.5319397 | 0.033797216  | 0.17631269  |
| CYCLIN_D1_KE_.V1_UP                        | 182 | 0.32691562 | 1.4527216 | 0.034274194  | 0.20706365  |
| KRAS.KIDNEY_UP.V1_UP                       | 136 | 0.4982055  | 1.6296653 | 0.036821704  | 0.20976704  |
| ATM_DN.V1_UP                               | 140 | 0.36542484 | 1.4805324 | 0.03777336   | 0.21914394  |
| ATF2_S_UP.V1_DN                            | 176 | 0.42690405 | 1.5966355 | 0.038022812  | 0.15418139  |
| P53_DN.V2_DN                               | 141 | 0.3371459  | 1.415629  | 0.038383838  | 0.23218915  |
| KRAS.600_UP.V1_UP                          | 261 | 0.4146874  | 1.600918  | 0.03846154   | 0.15655284  |
| CRX_NRL_DN.V1_UP                           | 129 | 0.32568383 | 1.3895055 | 0.039447732  | 0.23613079  |
| CAHOY_NEURONAL                             | 94  | 0.433898   | 1.5554782 | 0.04016064   | 0.16692613  |
| KRAS.300_UP.V1_UP                          | 136 | 0.42623508 | 1.5853728 | 0.040229887  | 0.16072713  |
| KRAS.PROSTATE_UP.V1_UP                     | 126 | 0.3875258  | 1.4564825 | 0.046184737  | 0.21344519  |
| BMI1_DN.V1_DN                              | 128 | 0.37935737 | 1.4708267 | 0.048732944  | 0.21842751  |
| ESC_V6.5_UP_LATE.V1_UP                     | 170 | 0.3962382  | 1.5070236 | 0.04950495   | 0.19469327  |
| HALLMARK_ANGIOGENESIS                      | 36  | 0.7268911  | 1.9551228 | 0.0          | 0.028812956 |
| HALLMARK_MYOGENESIS                        | 198 | 0.70394534 | 2.0488024 | 0.0020449897 | 0.019075861 |
| HALLMARK_EPITHELIAL_MESENCHYMAL_TRANSITION | 194 | 0.7119223  | 1.9293958 | 0.003984064  | 0.027211443 |

|         |                                                    |     |             |            |              |            |
|---------|----------------------------------------------------|-----|-------------|------------|--------------|------------|
|         | HALLMARK_COAGULATION                               | 136 | 0.5151289   | 1.8114622  | 0.0075901328 | 0.06288996 |
|         | HALLMARK_PANCREAS_BETA_CELLS                       | 40  | 0.47945312  | 1.6128231  | 0.02         | 0.22418033 |
|         | <b>patients with low expression of miR-154-5p</b>  |     |             |            |              |            |
|         | HALLMARK_ESTROGEN_RESPONSE_EARLY                   | 192 | -0.3684512  | -1.508271  | 0.032989692  | 1.0        |
|         | <b>patients with high expression of miR-154-5p</b> |     |             |            |              |            |
| Larynx  | AKT_UP_MTOR_DN.V1_DN                               | 177 | 0.34209406  | 1.4716623  | 0.03269231   | 1.0        |
|         | AKT_UP.V1_DN                                       | 179 | 0.40278888  | 1.5882095  | 0.03992016   | 1.0        |
|         | HALLMARK_ANGIOGENESIS                              | 36  | 0.59281003  | 1.6746945  | 0.03164557   | 0.36380783 |
|         | HALLMARK_MYOGENESIS                                | 198 | 0.54568565  | 1.7289077  | 0.037109375  | 0.49452442 |
|         | <b>patients with low expression of miR-154-5p</b>  |     |             |            |              |            |
|         | DCA_UP.V1_DN                                       | 162 | -0.32457164 | -1.4496114 | 0.01934236   | 1.0        |
|         | ESC_J1_UP_EARLY.V1_UP                              | 151 | -0.32092696 | -1.4028095 | 0.040935673  | 1.0        |
|         | HALLMARK_ALLOGRAFT_REJECTION                       | 195 | -0.63805974 | -1.8395994 | 0.030927835  | 0.17024265 |
|         | <b>patients with high expression of miR-154-5p</b> |     |             |            |              |            |
| Pharynx | CRX_DN.V1_DN                                       | 127 | 0.42043114  | 1.6781394  | 0.010204081  | 0.3680043  |
|         | CRX_NRL_DN.V1_DN                                   | 111 | 0.3611626   | 1.5442594  | 0.010330578  | 0.5486713  |
|         | AKT_UP.V1_DN                                       | 179 | 0.43504387  | 1.6993006  | 0.016        | 0.6178347  |
|         | AKT_UP_MTOR_DN.V1_DN                               | 177 | 0.3354621   | 1.4691406  | 0.031847134  | 0.5388127  |

|             |                                                        |     |             |            |              |             |
|-------------|--------------------------------------------------------|-----|-------------|------------|--------------|-------------|
| Oral cavity | ESC_V6.5_UP_EARLY.V1_DN                                | 153 | 0.45361865  | 1.6186346  | 0.03469388   | 0.42191383  |
|             | CAHOY_OLIGODENDRO<br>CUTIC                             | 85  | 0.35082164  | 1.4489464  | 0.03526971   | 0.53511864  |
|             | ESC_J1_UP_LATE.V1_UP                                   | 176 | 0.37258855  | 1.4947804  | 0.035789475  | 0.5297214   |
|             | HALLMARK_MYOGENESIS                                    | 198 | 0.67982894  | 2.0338547  | 0.0041753654 | 0.006919477 |
|             | HALLMARK_EPITHELIAL<br>_MESENCHYMAL_TRANS<br>ITION     | 194 | 0.6718212   | 1.7521929  | 0.02745098   | 0.11570975  |
|             | <b>patients with low<br/>expression of miR-154-5p</b>  |     |             |            |              |             |
|             | RB_P130_DN.V1_DN                                       | 120 | -0.48940206 | -1.7510496 | 0.009345794  | 0.10240098  |
|             | TBK1.DF_DN                                             | 258 | -0.5196189  | -1.7025776 | 0.01622718   | 0.10524474  |
|             | SINGH_KRAS_DEPENDENT<br>NCY_SIGNATURE                  | 20  | -0.76683635 | -1.7550769 | 0.028397566  | 0.20084381  |
|             | <b>patients with high<br/>expression of miR-154-5p</b> |     |             |            |              |             |
|             | GCNP_SHH_UP_LATE.V1<br>_DN                             | 168 | 0.3742599   | 1.6583126  | 0.002020202  | 0.59006065  |
|             | RB_P130_DN.V1_UP                                       | 116 | 0.47475716  | 1.7137499  | 0.0020833334 | 1.0         |
|             | AKT_UP_MTOR_DN.V1_D<br>N                               | 177 | 0.36592835  | 1.6096988  | 0.0061728396 | 0.51515704  |
|             | CRX_DN.V1_UP                                           | 124 | 0.35605535  | 1.5382963  | 0.008350731  | 0.42748865  |
|             | SRC_UP.V1_UP                                           | 148 | 0.41562843  | 1.5529585  | 0.0139442235 | 0.5566733   |
|             | AKT_UP.V1_DN                                           | 179 | 0.43954867  | 1.7097505  | 0.018789144  | 0.5878324   |
|             | MTOR_UP.V1_DN                                          | 170 | 0.40486565  | 1.651626   | 0.0256917    | 0.46497825  |
|             | JNK_DN.V1_DN                                           | 174 | 0.4018756   | 1.5947857  | 0.02736842   | 0.48263174  |
|             | CRX_NRL_DN.V1_UP                                       | 129 | 0.3468031   | 1.4924229  | 0.035416666  | 0.5221901   |
|             | CYCLIN_D1_UP.V1_UP                                     | 178 | 0.34826428  | 1.4817967  | 0.035490606  | 0.47595248  |
|             | ESC_J1_UP_LATE.V1_DN                                   | 160 | 0.31664708  | 1.3999306  | 0.040983606  | 0.4827413   |

|                            |     |            |           |             |            |
|----------------------------|-----|------------|-----------|-------------|------------|
| ESC_V6.5_UP_LATE.V1_D<br>N | 162 | 0.31629592 | 1.4213246 | 0.04233871  | 0.52835584 |
| KRAS.AMP.LUNG_UP.V1_<br>UP | 130 | 0.40842712 | 1.5475217 | 0.047916666 | 0.5047504  |

**Table S2.** List of processes based on the GSEA analysis of MSigDB gene sets enriched in HNSCC patients with lower and higher levels of *miR-154-3p* in all localization as well as depending on the localization in oral cavity, larynx or pharynx. Only gene sets with nominal  $p < 0.05$  were presented; SIZE - number of enriched genes in specified process, ES - enrichment score, NES - normalized enrichment score, FDR q-val - false discovery rate.

|                      | NAME                                           | SIZE          | ES         | NES       | NOM p-val    | FDR q-val    |
|----------------------|------------------------------------------------|---------------|------------|-----------|--------------|--------------|
| Lokalization         | patients with low<br>expression of miR-154-3p  | No enrichment |            |           |              |              |
|                      | patients with high<br>expression of miR-154-3p |               |            |           |              |              |
| All<br>localizations | AKT_UP.V1_DN                                   | 186           | 0.56028676 | 2.1796565 | 0.0          | 0.0017931035 |
|                      | ESC_V6.5_UP_LATE.V1_UP                         | 187           | 0.4912813  | 1.9530286 | 0.0          | 0.024408296  |
|                      | AKT_UP_MTOR_DN.V1_D<br>N                       | 183           | 0.44236442 | 1.9442787 | 0.0          | 0.01993367   |
|                      | MTOR_UP.V1_DN                                  | 179           | 0.46488515 | 1.8907892 | 0.0          | 0.029356206  |
|                      | ESC_V6.5_UP_EARLY.V1_<br>DN                    | 170           | 0.5393009  | 2.0287793 | 0.0018761726 | 0.015598844  |
|                      | CRX_DN.V1_DN                                   | 133           | 0.43369287 | 1.7313417 | 0.0019569471 | 0.064509705  |
|                      | CYCLIN_D1_UP.V1_UP                             | 185           | 0.41847295 | 1.766866  | 0.0020120724 | 0.05659865   |
|                      | CYCLIN_D1_KE_.V1_UP                            | 187           | 0.36532766 | 1.6089052 | 0.0020120724 | 0.10600192   |
|                      | GCNP_SHH_UP_LATE.V1_<br>DN                     | 175           | 0.38807258 | 1.6995656 | 0.0057142857 | 0.07046442   |
|                      | LEF1_UP.V1_UP                                  | 193           | 0.48920476 | 1.8454154 | 0.005791506  | 0.039553046  |
|                      | KRAS.600_UP.V1_UP                              | 273           | 0.45381328 | 1.7537911 | 0.005859375  | 0.059982512  |
|                      | CAHOY_ASTROGLIAL                               | 100           | 0.50143784 | 1.8302763 | 0.0058708414 | 0.03419879   |
|                      | NRL_DN.V1_DN                                   | 129           | 0.37102777 | 1.633271  | 0.0059405942 | 0.100295834  |
|                      | BMI1_DN.V1_UP                                  | 144           | 0.56438947 | 1.8351312 | 0.007736944  | 0.038197946  |
|                      | KRAS.300_UP.V1_UP                              | 143           | 0.47411144 | 1.7534115 | 0.007874016  | 0.055062752  |
|                      | KRAS.PROSTATE_UP.V1_<br>UP                     | 133           | 0.4167321  | 1.6173216 | 0.007874016  | 0.108538985  |
|                      | PKCA_DN.V1_DN                                  | 160           | 0.36382353 | 1.5571125 | 0.008        | 0.120997645  |

|                                    |     |            |           |              |             |
|------------------------------------|-----|------------|-----------|--------------|-------------|
| P53_DN.V2_DN                       | 143 | 0.36883068 | 1.563393  | 0.008281574  | 0.11919013  |
| ATF2_S_UP.V1_DN                    | 183 | 0.47763944 | 1.7724284 | 0.009578544  | 0.06050411  |
| CRX_NRL_DN.V1_DN                   | 126 | 0.36530733 | 1.5539541 | 0.009823183  | 0.11645774  |
| ESC_J1_UP_LATE.V1_UP               | 190 | 0.43791965 | 1.7128996 | 0.0114722755 | 0.07128647  |
| JNK_DN.V1_DN                       | 183 | 0.40268537 | 1.6128576 | 0.013618677  | 0.107554965 |
| SNF5_DN.V1_DN                      | 161 | 0.397052   | 1.6032484 | 0.015384615  | 0.10261076  |
| KRAS.AMP.LUNG_UP.V1_UP             | 139 | 0.39752188 | 1.5398251 | 0.015968064  | 0.12231667  |
| ATM_DN.V1_UP                       | 144 | 0.3898237  | 1.6068971 | 0.01622718   | 0.103437915 |
| CORDENONSI_YAP_CONSERVED_SIGNATURE | 57  | 0.5127401  | 1.7085344 | 0.017274473  | 0.069210045 |
| CAHOY_OLIGODENDROCTIC              | 97  | 0.382373   | 1.5325611 | 0.017964073  | 0.1257437   |
| ESC_J1_UP_EARLY.V1_DN              | 174 | 0.31309244 | 1.4448574 | 0.01908397   | 0.1757776   |
| WNT_UP.V1_UP                       | 177 | 0.34359294 | 1.4747274 | 0.01984127   | 0.15992926  |
| PTEN_DN.V1_UP                      | 185 | 0.41450268 | 1.5927682 | 0.022        | 0.10579497  |
| KRAS.KIDNEY_UP.V1_UP               | 142 | 0.49838185 | 1.647517  | 0.024242423  | 0.0982057   |
| CSR_LATE_UP.V1_DN                  | 161 | 0.38936192 | 1.5541435 | 0.026768642  | 0.12012326  |
| BCAT.100_UP.V1_DN                  | 38  | 0.44301105 | 1.5733078 | 0.026804123  | 0.11801403  |
| PTEN_DN.V2_DN                      | 137 | 0.33657074 | 1.4035423 | 0.03422053   | 0.18592863  |
| MEL18_DN.V1_UP                     | 140 | 0.5115615  | 1.6619292 | 0.036053132  | 0.093064725 |
| KRAS.50_UP.V1_UP                   | 48  | 0.50891614 | 1.6336975 | 0.03646833   | 0.10493443  |
| RB_P130_DN.V1_UP                   | 128 | 0.4099905  | 1.5316194 | 0.036734693  | 0.12316106  |
| PRC2_SUZ12_UP.V1_DN                | 182 | 0.34558478 | 1.4611349 | 0.03875969   | 0.16666754  |
| BCAT_BILD_ET_AL_UP                 | 45  | 0.438524   | 1.5237733 | 0.03952569   | 0.12706403  |
| BCAT.100_UP.V1_UP                  | 47  | 0.44722173 | 1.5408704 | 0.040152963  | 0.12528561  |
| BCAT_GDS748_DN                     | 43  | 0.4005337  | 1.4635793 | 0.043010753  | 0.16798286  |
| HALLMARK_MYOGENESIS                | 198 | 0.5857865  | 1.8978672 | 0.010683761  | 0.12087148  |

|                                            |                                             |               |            |             |             |             |
|--------------------------------------------|---------------------------------------------|---------------|------------|-------------|-------------|-------------|
|                                            | HALLMARK_EPITHELIAL_MESENCHYMAL_TRANSITION  | 194           | 0.6463002  | 1.8134077   | 0.027542373 | 0.14074229  |
|                                            |                                             |               |            |             |             |             |
| Larynx                                     | patients with low expression of miR-154-3p  | No enrichment |            |             |             |             |
|                                            |                                             |               |            |             |             |             |
|                                            | patients with high expression of miR-154-3p |               |            |             |             |             |
|                                            | CSR_LATE_UP.V1_UP                           | 170           | 0.5095815  | 1.8798832   | 0.004132231 | 0.08499931  |
|                                            | AKT_UP_MTOR_DN.V1_DN                        | 183           | 0.3547783  | 1.5097848   | 0.015717093 | 0.4540008   |
|                                            | ESC_V6.5_UP_LATE.V1_UP                      | 187           | 0.41751322 | 1.6434906   | 0.017509727 | 0.70383555  |
|                                            | BCAT_GDS748_UP                              | 48            | 0.44833022 | 1.5904704   | 0.019305019 | 0.7317408   |
|                                            | SNF5_DN.V1_DN                               | 161           | 0.36164638 | 1.5084386   | 0.024291499 | 0.41381618  |
|                                            | CRX_NRL_DN.V1_DN                            | 126           | 0.3428042  | 1.4622862   | 0.04048583  | 0.41364855  |
|                                            | KRAS.600_UP.V1_UP                           | 273           | 0.4309471  | 1.5710124   | 0.041257367 | 0.6375813   |
|                                            | KRAS.300_UP.V1_UP                           | 143           | 0.43796596 | 1.5487969   | 0.046783626 | 0.60819215  |
|                                            | HALLMARK_MYOGENESIS                         | 198           | 0.5857865  | 1.8978672   | 0.010683761 | 0.12087148  |
| HALLMARK_EPITHELIAL_MESENCHYMAL_TRANSITION | 194                                         | 0.6463002     | 1.8134077  | 0.027542373 | 0.14074229  |             |
|                                            |                                             |               |            |             |             |             |
| Pharynx                                    | patients with low expression of miR-154-3p  |               |            |             |             |             |
|                                            | HALLMARK_E2F_TARGETS                        | 187           | -0.6802637 | -1.8862922  | 0.014112903 | 0.11118078  |
|                                            | HALLMARK_G2M_CHECKPOINT                     | 184           | -0.6064035 | -1.8568065  | 0.018595042 | 0.07270152  |
|                                            |                                             |               |            |             |             |             |
|                                            | patients with high expression of miR-154-3p |               |            |             |             |             |
|                                            | ESC_J1_UP_LATE.V1_UP                        | 190           | 0.48204732 | 1.929881    | 0.0         | 0.041719574 |
|                                            | BCAT.100_UP.V1_UP                           | 47            | 0.5718491  | 1.8956203   | 0.0         | 0.035667643 |

|                                        |     |            |           |              |             |
|----------------------------------------|-----|------------|-----------|--------------|-------------|
| CRX_NRL_DN.V1_DN                       | 126 | 0.42834833 | 1.86238   | 0.0          | 0.02767766  |
| CRX_DN.V1_DN                           | 133 | 0.4646415  | 1.8566265 | 0.0          | 0.024174072 |
| NRL_DN.V1_DN                           | 129 | 0.41368577 | 1.8391927 | 0.0          | 0.025369184 |
| AKT_UP_MTOR_DN.V1_DN                   | 183 | 0.38696566 | 1.6563246 | 0.0          | 0.0771485   |
| AKT_UP.V1_DN                           | 186 | 0.50033617 | 1.8796655 | 0.0018248175 | 0.023064781 |
| CAHOY_OLIGODENDRO<br>CUTIC             | 97  | 0.4253644  | 1.7329963 | 0.0018691589 | 0.048996754 |
| ESC_V6.5_UP_LATE.V1_UP                 | 187 | 0.47258893 | 1.8950207 | 0.0019047619 | 0.023778427 |
| SNF5_DN.V1_DN                          | 161 | 0.44967312 | 1.7536162 | 0.0019267823 | 0.04548479  |
| MTOR_UP.V1_DN                          | 179 | 0.4247355  | 1.7566849 | 0.0036630037 | 0.048450958 |
| ESC_V6.5_UP_EARLY.V1_DN                | 170 | 0.5127685  | 1.8070983 | 0.0056179776 | 0.032437876 |
| LEF1_UP.V1_UP                          | 193 | 0.46868858 | 1.7509977 | 0.0057803467 | 0.043366257 |
| YAP1_UP                                | 46  | 0.46993658 | 1.6788923 | 0.0058365758 | 0.06923028  |
| WNT_UP.V1_UP                           | 177 | 0.3788462  | 1.6375798 | 0.0058708414 | 0.07936641  |
| KRAS.KIDNEY_UP.V1_UP                   | 142 | 0.5444543  | 1.7869693 | 0.0060362173 | 0.036202777 |
| CAHOY_ASTROGLIAL                       | 100 | 0.47663546 | 1.7024447 | 0.015267176  | 0.059626777 |
| KRAS.300_UP.V1_UP                      | 143 | 0.4651405  | 1.7122635 | 0.015748031  | 0.057191994 |
| CORDENONSI_YAP_CON<br>SERVED_SIGNATURE | 57  | 0.5108649  | 1.6654265 | 0.015936255  | 0.07502026  |
| KRAS.600_UP.V1_UP                      | 273 | 0.42238936 | 1.6462033 | 0.018036073  | 0.08146983  |
| JNK_DN.V1_DN                           | 183 | 0.3808899  | 1.5554901 | 0.018181818  | 0.14036986  |
| MEL18_DN.V1_DN                         | 148 | 0.44720942 | 1.6443839 | 0.019723866  | 0.07875094  |
| GCNP_SHH_UP_LATE.V1_DN                 | 175 | 0.32447812 | 1.4128036 | 0.02079395   | 0.22958317  |
| ATM_DN.V1_UP                           | 144 | 0.36395836 | 1.5410647 | 0.022540983  | 0.14352724  |
| NOTCH_DN.V1_UP                         | 185 | 0.34537467 | 1.4807234 | 0.023904383  | 0.1763045   |
| ATF2_S_UP.V1_DN                        | 183 | 0.4366     | 1.6162044 | 0.0251938    | 0.0882855   |
| GLI1_UP.V1_UP                          | 27  | 0.46683082 | 1.559212  | 0.027777778  | 0.14257443  |



|             |                                                   |     |             |            |              |              |
|-------------|---------------------------------------------------|-----|-------------|------------|--------------|--------------|
|             | KRAS.50_UP.V1_UP                                  | 48  | 0.52359563  | 1.6350644  | 0.030947777  | 0.07757031   |
|             | BMI1_DN_MEL18_DN.V1_DN                            | 146 | 0.4059437   | 1.542301   | 0.03187251   | 0.14784521   |
|             | KRAS.600.LUNG.BREAST_UP.V1_UP                     | 274 | 0.36797923  | 1.4930128  | 0.038229376  | 0.18165754   |
|             | CTIP_DN.V1_UP                                     | 126 | 0.39599085  | 1.4975284  | 0.04477612   | 0.18251292   |
|             | PTEN_DN.V1_UP                                     | 185 | 0.3815244   | 1.4915613  | 0.046277665  | 0.1784513    |
|             | BCAT_BILD_ET_AL_UP                                | 45  | 0.44675708  | 1.5034374  | 0.04681648   | 0.18095581   |
|             | CYCLIN_D1_KE_.V1_UP                               | 187 | 0.33151716  | 1.4300984  | 0.04887218   | 0.22248046   |
|             | HALLMARK_MYOGENESIS                               | 198 | 0.7145784   | 2.117106   | 0.0          | 0.0010399999 |
|             | HALLMARK_ANGIOGENESIS                             | 36  | 0.69430226  | 1.8271418  | 0.001980198  | 0.03932752   |
|             | HALLMARK_EPITHELIAL_MESENCHYMAL_TRANSITION        | 194 | 0.72035646  | 1.8964407  | 0.0039138943 | 0.04117608   |
|             | HALLMARK_COAGULATION                              | 136 | 0.52564484  | 1.8423983  | 0.006085193  | 0.04639429   |
|             | HALLMARK_APICAL_JUNCTION                          | 194 | 0.4655951   | 1.6966884  | 0.013861386  | 0.074379586  |
|             | HALLMARK_UV_RESPONSE_DN                           | 137 | 0.5291569   | 1.7341154  | 0.02434457   | 0.069298126  |
| Oral cavity | <b>patients with low expression of miR-154-3p</b> |     |             |            |              |              |
|             | AKT_UP.V1_UP                                      | 166 | -0.36235863 | -1.5241708 | 0.020449897  | 0.53579515   |
|             | RB_P130_DN.V1_DN                                  | 136 | -0.462385   | -1.6441884 | 0.024        | 0.65249217   |
|             | AKT_UP_MTOR_DN.V1_UP                              | 180 | -0.32997704 | -1.440209  | 0.032719836  | 0.552364     |
|             | SINGH_KRAS_DEPENDENCY_SIGNATURE_                  | 20  | -0.7355437  | -1.6171035 | 0.037037037  | 0.40179473   |
|             | HALLMARK_ESTROGEN_RESPONSE_LATE                   | 195 | -0.3557498  | -1.507586  | 0.021696253  | 1.0          |
|             | HALLMARK_HEME_METABOLISM                          | 190 | -0.30163595 | -1.3503901 | 0.046692606  | 0.61580694   |

| patients with high expression of miR-154-3p        |     |            |           |              |            |
|----------------------------------------------------|-----|------------|-----------|--------------|------------|
| AKT_UP.V1_DN                                       | 186 | 0.50241196 | 1.9108553 | 0.0020618557 | 0.091749   |
| AKT_UP_MTOR_DN.V1_D<br>N                           | 183 | 0.37051854 | 1.5987741 | 0.006355932  | 0.80869895 |
| P53_DN.V2_DN                                       | 143 | 0.35756117 | 1.5130025 | 0.012765957  | 0.57937676 |
| MTOR_UP.V1_DN                                      | 179 | 0.41138262 | 1.6778622 | 0.014344262  | 0.6059425  |
| PTEN_DN.V2_DN                                      | 137 | 0.34919706 | 1.4653875 | 0.022680413  | 0.423244   |
| CYCLIN_D1_UP.V1_UP                                 | 185 | 0.34569985 | 1.4742062 | 0.027027028  | 0.42829973 |
| RB_P130_DN.V1_UP                                   | 128 | 0.43527794 | 1.553512  | 0.036437247  | 0.5809809  |
| VEGF_A_UP.V1_UP                                    | 193 | 0.40866178 | 1.5551827 | 0.036659878  | 0.68731534 |
| SNF5_DN.V1_UP                                      | 174 | 0.42084318 | 1.5565385 | 0.047325104  | 0.8492638  |
| HALLMARK_MYOGENESI<br>S                            | 198 | 0.6216926  | 1.8754559 | 0.018789144  | 0.10435163 |
| HALLMARK_ANGIOGEN<br>ESIS                          | 36  | 0.5797845  | 1.6619582 | 0.04008016   | 0.24042602 |
| HALLMARK_EPITHELIAL<br>_MESENCHYMAL_TRANS<br>ITION | 194 | 0.5964984  | 1.7075882 | 0.047131147  | 0.2522565  |

**Supplementary Table S2.** [Correlation between miR-154-5p and 24 genes selected based on miRNA targets with score, function and interactions between targets using the GeneMANIA tool.](#)

| Correlation miR-154-5p and its target |                       |               |                            |         |                       |
|---------------------------------------|-----------------------|---------------|----------------------------|---------|-----------------------|
| Analyzed pair                         | Spearman/Pearson<br>R | R-coefficient | 95% confidence<br>interval | P value | Number of<br>XY Pairs |
| miR-154-5p<br>vs.<br>ABI1             | Spearman r            | -0.1954       | -0.2853 to -0.1020         | <0.0001 | 449                   |
| miR-154-5p<br>vs.<br>CPEB3            | Spearman r            | -0.1873       | -0.2777 to -0.09376        | <0.0001 | 449                   |

|                                                                              |                            |                         |                                      |                            |                     |
|------------------------------------------------------------------------------|----------------------------|-------------------------|--------------------------------------|----------------------------|---------------------|
| <a href="#">miR-154-5p</a><br><a href="#">vs.</a><br><a href="#">DMXL1</a>   | <a href="#">Spearman r</a> | <a href="#">-0.2121</a> | <a href="#">-0.3012 to -0.1192</a>   | <a href="#">&lt;0.0001</a> | <a href="#">449</a> |
| <a href="#">miR-154-5p</a><br><a href="#">vs.</a><br><a href="#">NPEPPS</a>  | <a href="#">Pearson r</a>  | <a href="#">-0.1895</a> | <a href="#">-0.2772 to -0.09866</a>  | <a href="#">&lt;0.0001</a> | <a href="#">449</a> |
| <a href="#">miR-154-5p</a><br><a href="#">vs.</a><br><a href="#">PLAGL2</a>  | <a href="#">Pearson r</a>  | <a href="#">-0.1601</a> | <a href="#">-0.2489 to -0.06854</a>  | <a href="#">0.0007</a>     | <a href="#">449</a> |
| <a href="#">miR-154-5p</a><br><a href="#">vs.</a><br><a href="#">CNOT4</a>   | <a href="#">Spearman r</a> | <a href="#">-0.1821</a> | <a href="#">-0.2727 to -0.08842</a>  | <a href="#">0.0001</a>     | <a href="#">449</a> |
| <a href="#">miR-154-5p</a><br><a href="#">vs.</a><br><a href="#">LIN9</a>    | <a href="#">Spearman r</a> | <a href="#">-0.1223</a> | <a href="#">-0.2150 to -0.02733</a>  | <a href="#">0.0095</a>     | <a href="#">449</a> |
| <a href="#">miR-154-5p</a><br><a href="#">vs.</a><br><a href="#">VPS4B</a>   | <a href="#">Spearman r</a> | <a href="#">-0.3055</a> | <a href="#">-0.3894 to -0.2165</a>   | <a href="#">&lt;0.0001</a> | <a href="#">449</a> |
| <a href="#">miR-154-5p</a><br><a href="#">vs.</a><br><a href="#">WAC</a>     | <a href="#">Spearman r</a> | <a href="#">-0.1242</a> | <a href="#">-0.2169 to -0.02925</a>  | <a href="#">0.0084</a>     | <a href="#">449</a> |
| <a href="#">miR-154-5p</a><br><a href="#">vs.</a><br><a href="#">CEACAM7</a> | <a href="#">Spearman r</a> | <a href="#">-0.2039</a> | <a href="#">-0.2934 to -0.1108</a>   | <a href="#">&lt;0.0001</a> | <a href="#">449</a> |
| <a href="#">miR-154-5p</a><br><a href="#">vs.</a><br><a href="#">LRRC1</a>   | <a href="#">Spearman r</a> | <a href="#">-0.2211</a> | <a href="#">-0.3099 to -0.1286</a>   | <a href="#">&lt;0.0001</a> | <a href="#">449</a> |
| <a href="#">miR-154-5p</a><br><a href="#">vs.</a><br><a href="#">MYO6</a>    | <a href="#">Spearman r</a> | <a href="#">-0.2353</a> | <a href="#">-0.3233 to -0.1432</a>   | <a href="#">&lt;0.0001</a> | <a href="#">449</a> |
| <a href="#">miR-154-5p</a><br><a href="#">vs.</a><br><a href="#">PTBP3</a>   | <a href="#">Spearman r</a> | <a href="#">-0.1404</a> | <a href="#">-0.2326 to -0.04575</a>  | <a href="#">0.0029</a>     | <a href="#">449</a> |
| <a href="#">miR-154-5p</a><br><a href="#">vs.</a><br><a href="#">RNF138</a>  | <a href="#">Spearman r</a> | <a href="#">-0.1013</a> | <a href="#">-0.1947 to -0.006130</a> | <a href="#">0.0318</a>     | <a href="#">449</a> |
| <a href="#">miR-154-5p</a><br><a href="#">vs.</a>                            | <a href="#">Spearman r</a> | <a href="#">-0.1458</a> | <a href="#">-0.2378 to -0.05126</a>  | <a href="#">0.002</a>      | <a href="#">449</a> |

|                                                                                |                            |                          |                                                         |                                  |                                 |
|--------------------------------------------------------------------------------|----------------------------|--------------------------|---------------------------------------------------------|----------------------------------|---------------------------------|
| <a href="#">C12ORF29</a>                                                       |                            |                          |                                                         |                                  |                                 |
| <a href="#">miR-154-5p</a><br><a href="#">vs.</a><br><a href="#">CDKN2B</a>    | <a href="#">Spearman r</a> | <a href="#">-0.1923</a>  | <a href="#">-0.2824 to -0.09886</a>                     | <a href="#">&lt;0.0001</a>       | <a href="#">449</a>             |
| <a href="#">miR-154-5p</a><br><a href="#">vs.</a><br><a href="#">DCAF16</a>    | <a href="#">Pearson r</a>  | <a href="#">-0.09533</a> | <a href="#">-0.1862 to -0.002809</a>                    | <a href="#">0.0435</a>           | <a href="#">449</a>             |
| <a href="#">miR-154-5p</a><br><a href="#">vs.</a><br><a href="#">ESRP1</a>     | <a href="#">Spearman r</a> | <a href="#">-0.1884</a>  | <a href="#">-0.2786 to -0.09482</a>                     | <a href="#">&lt;0.0001</a>       | <a href="#">449</a>             |
| <a href="#">miR-154-5p</a><br><a href="#">vs.</a><br><a href="#">GNAI3</a>     | <a href="#">Spearman r</a> | <a href="#">-0.1007</a>  | <a href="#">-0.1941 to -0.005451</a>                    | <a href="#">0.033</a>            | <a href="#">449</a>             |
| <a href="#">miR-154-5p</a><br><a href="#">vs.</a><br><a href="#">LIN54</a>     | <a href="#">Pearson r</a>  | <a href="#">-0.1847</a>  | <a href="#">-0.2726 to -0.09381</a>                     | <a href="#">&lt;0.0001</a>       | <a href="#">449</a>             |
| <a href="#">miR-154-5p</a><br><a href="#">vs.</a><br><a href="#">NSD2</a>      | <a href="#">Pearson r</a>  | <a href="#">-0.09532</a> | <a href="#">-0.1862 to -0.002806</a>                    | <a href="#">0.0435</a>           | <a href="#">449</a>             |
| <a href="#">miR-154-5p</a><br><a href="#">vs.</a><br><a href="#">OVOL1</a>     | <a href="#">Spearman r</a> | <a href="#">-0.1977</a>  | <a href="#">-0.2875 to -0.1044</a>                      | <a href="#">&lt;0.0001</a>       | <a href="#">449</a>             |
| <a href="#">miR-154-5p</a><br><a href="#">vs.</a><br><a href="#">TMPRSS11D</a> | <a href="#">Spearman r</a> | <a href="#">-0.1379</a>  | <a href="#">-0.2301 to -0.04320</a>                     | <a href="#">0.0034</a>           | <a href="#">449</a>             |
| <a href="#">miR-154-5p</a><br><a href="#">vs.</a><br><a href="#">XPO7</a>      | <a href="#">Spearman r</a> | <a href="#">-0.1862</a>  | <a href="#">-0.2766 to -0.09260</a>                     | <a href="#">&lt;0.0001</a>       | <a href="#">449</a>             |
| <b><a href="#">Functions of miR-154-5p targets</a></b>                         |                            |                          |                                                         |                                  |                                 |
| <a href="#">Function</a>                                                       |                            |                          | <a href="#">FDR</a>                                     | <a href="#">Genes in network</a> | <a href="#">Genes in genome</a> |
| <a href="#">ESCRT complex disassembly</a>                                      |                            |                          | <a href="#">0.0242999293293435</a><br><a href="#">7</a> | <a href="#">3</a>                | <a href="#">10</a>              |
| <a href="#">cell cycle checkpoint</a>                                          |                            |                          | <a href="#">0.0526712161109135</a><br><a href="#">6</a> | <a href="#">6</a>                | <a href="#">201</a>             |
| <a href="#">negative regulation of mitotic cell cycle</a>                      |                            |                          | <a href="#">0.0855856859725957</a><br><a href="#">1</a> | <a href="#">6</a>                | <a href="#">263</a>             |

|                                                                         |                                    |                                                                                                                                           |                    |
|-------------------------------------------------------------------------|------------------------------------|-------------------------------------------------------------------------------------------------------------------------------------------|--------------------|
|                                                                         | <a href="#">0.0855856859725957</a> |                                                                                                                                           |                    |
| <a href="#">positive regulation of viral life cycle</a>                 | <a href="#">1</a>                  | <a href="#">3</a>                                                                                                                         | <a href="#">25</a> |
|                                                                         | <a href="#">0.0855856859725957</a> |                                                                                                                                           |                    |
| <a href="#">regulation of viral release from host cell</a>              | <a href="#">1</a>                  | <a href="#">3</a>                                                                                                                         | <a href="#">26</a> |
|                                                                         | <a href="#">0.0855856859725957</a> |                                                                                                                                           |                    |
| <a href="#">midbody</a>                                                 | <a href="#">1</a>                  | <a href="#">3</a>                                                                                                                         | <a href="#">21</a> |
|                                                                         | <a href="#">0.0885427763281852</a> |                                                                                                                                           |                    |
| <a href="#">virion assembly</a>                                         | <a href="#">7</a>                  | <a href="#">3</a>                                                                                                                         | <a href="#">29</a> |
|                                                                         | <a href="#">0.0885427763281852</a> |                                                                                                                                           |                    |
| <a href="#">viral release from host cell</a>                            | <a href="#">7</a>                  | <a href="#">3</a>                                                                                                                         | <a href="#">29</a> |
|                                                                         | <a href="#">0.0885427763281852</a> |                                                                                                                                           |                    |
| <a href="#">multivesicular body organization</a>                        | <a href="#">7</a>                  | <a href="#">3</a>                                                                                                                         | <a href="#">30</a> |
|                                                                         | <a href="#">0.0897192220870177</a> |                                                                                                                                           |                    |
| <a href="#">negative regulation of cell cycle G1/S phase transition</a> | <a href="#">3</a>                  | <a href="#">4</a>                                                                                                                         | <a href="#">93</a> |
|                                                                         | <a href="#">0.0897192220870177</a> |                                                                                                                                           |                    |
| <a href="#">exit from host</a>                                          | <a href="#">3</a>                  | <a href="#">3</a>                                                                                                                         | <a href="#">33</a> |
|                                                                         | <a href="#">0.0897192220870177</a> |                                                                                                                                           |                    |
| <a href="#">exit from host cell</a>                                     | <a href="#">3</a>                  | <a href="#">3</a>                                                                                                                         | <a href="#">33</a> |
| <b>Score and function</b>                                               |                                    |                                                                                                                                           |                    |
| <a href="#">Gene</a>                                                    | <a href="#">Score</a>              | <a href="#">Functions</a>                                                                                                                 |                    |
| <a href="#">LIN9</a>                                                    | <a href="#">0.8147884106262913</a> |                                                                                                                                           |                    |
| <a href="#">LRRC1</a>                                                   | <a href="#">0.7570225744326464</a> |                                                                                                                                           |                    |
| <a href="#">WAC</a>                                                     | <a href="#">0.7514653433623196</a> | <a href="#">cell cycle checkpoint</a>                                                                                                     |                    |
| <a href="#">DCAF16</a>                                                  | <a href="#">0.7357887790082105</a> |                                                                                                                                           |                    |
| <a href="#">C12orf29</a>                                                | <a href="#">0.7309620162356512</a> |                                                                                                                                           |                    |
| <a href="#">CPEB3</a>                                                   | <a href="#">0.7247154071581097</a> |                                                                                                                                           |                    |
| <a href="#">OVOL1</a>                                                   | <a href="#">0.7159273552468898</a> |                                                                                                                                           |                    |
| <a href="#">CDKN2B</a>                                                  | <a href="#">0.7057027545919609</a> | <a href="#">cell cycle checkpoint, negative regulation of cell cycle G1/S phase transition, negative regulation of mitotic cell cycle</a> |                    |
| <a href="#">CNOT4</a>                                                   | <a href="#">0.6856385674944434</a> | <a href="#">cell cycle checkpoint, negative regulation of cell cycle G1/S phase transition, negative regulation of mitotic cell cycle</a> |                    |
| <a href="#">PLAGL2</a>                                                  | <a href="#">0.6817377390752662</a> |                                                                                                                                           |                    |

|                           |                                          |                                                                                                                                                                                                                                                               |  |  |  |
|---------------------------|------------------------------------------|---------------------------------------------------------------------------------------------------------------------------------------------------------------------------------------------------------------------------------------------------------------|--|--|--|
| <a href="#">NSD2</a>      | <a href="#">0.68137600097079</a>         |                                                                                                                                                                                                                                                               |  |  |  |
| <a href="#">PTBP3</a>     | <a href="#">0.6803369404968923</a>       |                                                                                                                                                                                                                                                               |  |  |  |
| <a href="#">NPEPPS</a>    | <a href="#">0.6738095573295986</a>       |                                                                                                                                                                                                                                                               |  |  |  |
| <a href="#">CEACAM7</a>   | <a href="#">0.6716646125926766</a>       |                                                                                                                                                                                                                                                               |  |  |  |
| <a href="#">XPO7</a>      | <a href="#">0.6671771642456521</a>       |                                                                                                                                                                                                                                                               |  |  |  |
| <a href="#">TMPRSS11D</a> | <a href="#">0.6521309249840034</a>       |                                                                                                                                                                                                                                                               |  |  |  |
| <a href="#">DMXL1</a>     | <a href="#">0.6408571244012663</a>       |                                                                                                                                                                                                                                                               |  |  |  |
| <a href="#">ABI1</a>      | <a href="#">0.6360087013917106</a>       |                                                                                                                                                                                                                                                               |  |  |  |
| <a href="#">RNF138</a>    | <a href="#">0.633831587103936</a>        |                                                                                                                                                                                                                                                               |  |  |  |
| <a href="#">MYO6</a>      | <a href="#">0.6255285691983021</a>       |                                                                                                                                                                                                                                                               |  |  |  |
| <a href="#">ESRP1</a>     | <a href="#">0.6186632993783615</a>       |                                                                                                                                                                                                                                                               |  |  |  |
| <a href="#">LIN54</a>     | <a href="#">0.6093346904694159</a>       |                                                                                                                                                                                                                                                               |  |  |  |
| <a href="#">VPS4B</a>     | <a href="#">0.6017001241319717</a>       | <a href="#">ESCRT complex disassembly, exit from host, exit from host cell, midbody, multivesicular body organization, positive regulation of viral life cycle, regulation of viral release from host cell, viral release from host cell, virion assembly</a> |  |  |  |
| <a href="#">GNAI3</a>     | <a href="#">0.5644190534521365</a>       |                                                                                                                                                                                                                                                               |  |  |  |
| <a href="#">LIN52</a>     | <a href="#">0.0484538980046133</a><br>6  |                                                                                                                                                                                                                                                               |  |  |  |
| <a href="#">LIN37</a>     | <a href="#">0.0400031120649518</a><br>3  |                                                                                                                                                                                                                                                               |  |  |  |
| <a href="#">MYBL1</a>     | <a href="#">0.0378457639368982</a>       |                                                                                                                                                                                                                                                               |  |  |  |
| <a href="#">L3MBTL2</a>   | <a href="#">0.0373369325970173</a><br>7  |                                                                                                                                                                                                                                                               |  |  |  |
| <a href="#">RBBP4</a>     | <a href="#">0.0335285503978775</a>       |                                                                                                                                                                                                                                                               |  |  |  |
| <a href="#">MYBL2</a>     | <a href="#">0.0295998425093396</a><br>7  |                                                                                                                                                                                                                                                               |  |  |  |
| <a href="#">DYRK1A</a>    | <a href="#">0.0134234082728587</a><br>61 |                                                                                                                                                                                                                                                               |  |  |  |

|                                              |                                                           |                                                                                                                                                                                                                                                                                                                                 |                               |                              |  |
|----------------------------------------------|-----------------------------------------------------------|---------------------------------------------------------------------------------------------------------------------------------------------------------------------------------------------------------------------------------------------------------------------------------------------------------------------------------|-------------------------------|------------------------------|--|
| <a href="#">DDB1</a>                         | <a href="#">0.0123566510799688</a><br><a href="#">06</a>  | <a href="#">exit from host, exit from host cell, positive regulation of viral life cycle, regulation of viral release from host cell, viral release from host cell</a>                                                                                                                                                          |                               |                              |  |
| <a href="#">MICAL3</a>                       | <a href="#">0.0112805958213961</a><br><a href="#">78</a>  | <a href="#">midbody</a>                                                                                                                                                                                                                                                                                                         |                               |                              |  |
| <a href="#">MAU2</a>                         | <a href="#">0.0086454208869554</a><br><a href="#">13</a>  |                                                                                                                                                                                                                                                                                                                                 |                               |                              |  |
| <a href="#">RECQL4</a>                       | <a href="#">0.0086072686457085</a><br><a href="#">99</a>  |                                                                                                                                                                                                                                                                                                                                 |                               |                              |  |
| <a href="#">VTA1</a>                         | <a href="#">0.0080022755727215</a><br><a href="#">96</a>  | <a href="#">ESCRT complex disassembly, multivesicular body organization, virion assembly</a>                                                                                                                                                                                                                                    |                               |                              |  |
| <a href="#">TOP2A</a>                        | <a href="#">0.0071598108723617</a><br><a href="#">27</a>  | <a href="#">cell cycle checkpoint, negative regulation of mitotic cell cycle</a>                                                                                                                                                                                                                                                |                               |                              |  |
| <a href="#">RBL1</a>                         | <a href="#">0.0070209074887812</a><br><a href="#">58</a>  | <a href="#">negative regulation of cell cycle G1/S phase transition, negative regulation of mitotic cell cycle</a>                                                                                                                                                                                                              |                               |                              |  |
| <a href="#">RELCH</a>                        | <a href="#">0.0067657263361064</a><br><a href="#">48</a>  |                                                                                                                                                                                                                                                                                                                                 |                               |                              |  |
| <a href="#">RNF111</a>                       | <a href="#">0.0064105577743465</a><br><a href="#">15</a>  |                                                                                                                                                                                                                                                                                                                                 |                               |                              |  |
| <a href="#">RALB</a>                         | <a href="#">0.0063929211645848</a><br><a href="#">97</a>  |                                                                                                                                                                                                                                                                                                                                 |                               |                              |  |
| <a href="#">CDC25A</a>                       | <a href="#">0.0059972536066349</a><br><a href="#">45</a>  |                                                                                                                                                                                                                                                                                                                                 |                               |                              |  |
| <a href="#">E2F1</a>                         | <a href="#">0.0059877956437482</a><br><a href="#">95</a>  | <a href="#">cell cycle checkpoint, negative regulation of cell cycle G1/S phase transition, negative regulation of mitotic cell cycle</a>                                                                                                                                                                                       |                               |                              |  |
| <a href="#">VPS4A</a>                        | <a href="#">0.0057962397856759</a><br><a href="#">496</a> | <a href="#">cell cycle checkpoint, ESCRT complex disassembly, exit from host, exit from host cell, midbody, multivesicular body organization, negative regulation of mitotic cell cycle, positive regulation of viral life cycle, regulation of viral release from host cell, viral release from host cell, virion assembly</a> |                               |                              |  |
| <a href="#">Interactions between targets</a> |                                                           |                                                                                                                                                                                                                                                                                                                                 |                               |                              |  |
| <a href="#">Gene 1</a>                       | <a href="#">Gene 2</a>                                    | <a href="#">Weight</a>                                                                                                                                                                                                                                                                                                          | <a href="#">Network group</a> | <a href="#">Network</a>      |  |
| <a href="#">NPEPPS</a>                       | <a href="#">C12orf29</a>                                  | <a href="#">0.022279615</a>                                                                                                                                                                                                                                                                                                     | <a href="#">Co-expression</a> | <a href="#">Zlotnik-2019</a> |  |
| <a href="#">TMPRSS11D</a>                    | <a href="#">CDKN2B</a>                                    | <a href="#">0.015407225</a>                                                                                                                                                                                                                                                                                                     | <a href="#">Co-expression</a> | <a href="#">Zlotnik-2019</a> |  |
| <a href="#">TMPRSS11D</a>                    | <a href="#">CEACAM7</a>                                   | <a href="#">0.017072676</a>                                                                                                                                                                                                                                                                                                     | <a href="#">Co-expression</a> | <a href="#">Zlotnik-2019</a> |  |
| <a href="#">ABI1</a>                         | <a href="#">C12orf29</a>                                  | <a href="#">0.028698482</a>                                                                                                                                                                                                                                                                                                     | <a href="#">Co-expression</a> | <a href="#">Zlotnik-2019</a> |  |
| <a href="#">ESRP1</a>                        | <a href="#">LRRC1</a>                                     | <a href="#">0.008100562</a>                                                                                                                                                                                                                                                                                                     | <a href="#">Co-expression</a> | <a href="#">Zlotnik-2019</a> |  |
| <a href="#">ESRP1</a>                        | <a href="#">PTBP3</a>                                     | <a href="#">0.010739899</a>                                                                                                                                                                                                                                                                                                     | <a href="#">Co-expression</a> | <a href="#">Zlotnik-2019</a> |  |

|                        |                          |                              |                               |                              |  |
|------------------------|--------------------------|------------------------------|-------------------------------|------------------------------|--|
| <a href="#">VPS4B</a>  | <a href="#">LRRC1</a>    | <a href="#">0.01042017</a>   | <a href="#">Co-expression</a> | <a href="#">Zlotnik-2019</a> |  |
| <a href="#">VPS4B</a>  | <a href="#">ABI1</a>     | <a href="#">0.010710415</a>  | <a href="#">Co-expression</a> | <a href="#">Zlotnik-2019</a> |  |
| <a href="#">GNAI3</a>  | <a href="#">PTBP3</a>    | <a href="#">0.012533406</a>  | <a href="#">Co-expression</a> | <a href="#">Zlotnik-2019</a> |  |
| <a href="#">GNAI3</a>  | <a href="#">VPS4B</a>    | <a href="#">0.0058445884</a> | <a href="#">Co-expression</a> | <a href="#">Zlotnik-2019</a> |  |
| <a href="#">MYBL2</a>  | <a href="#">MYBL1</a>    | <a href="#">0.012533161</a>  | <a href="#">Co-expression</a> | <a href="#">Zlotnik-2019</a> |  |
| <a href="#">VTA1</a>   | <a href="#">NPEPPS</a>   | <a href="#">0.023306785</a>  | <a href="#">Co-expression</a> | <a href="#">Zlotnik-2019</a> |  |
| <a href="#">RBL1</a>   | <a href="#">MYBL2</a>    | <a href="#">0.01107938</a>   | <a href="#">Co-expression</a> | <a href="#">Zlotnik-2019</a> |  |
| <a href="#">RELCH</a>  | <a href="#">C12orf29</a> | <a href="#">0.022101806</a>  | <a href="#">Co-expression</a> | <a href="#">Zlotnik-2019</a> |  |
| <a href="#">RELCH</a>  | <a href="#">NPEPPS</a>   | <a href="#">0.018847946</a>  | <a href="#">Co-expression</a> | <a href="#">Zlotnik-2019</a> |  |
| <a href="#">RELCH</a>  | <a href="#">ABI1</a>     | <a href="#">0.022219187</a>  | <a href="#">Co-expression</a> | <a href="#">Zlotnik-2019</a> |  |
| <a href="#">RELCH</a>  | <a href="#">VPS4B</a>    | <a href="#">0.009669509</a>  | <a href="#">Co-expression</a> | <a href="#">Zlotnik-2019</a> |  |
| <a href="#">RNF111</a> | <a href="#">WAC</a>      | <a href="#">0.008207716</a>  | <a href="#">Co-expression</a> | <a href="#">Zlotnik-2019</a> |  |
| <a href="#">RNF111</a> | <a href="#">C12orf29</a> | <a href="#">0.007489541</a>  | <a href="#">Co-expression</a> | <a href="#">Zlotnik-2019</a> |  |
| <a href="#">RNF111</a> | <a href="#">NPEPPS</a>   | <a href="#">0.0069940635</a> | <a href="#">Co-expression</a> | <a href="#">Zlotnik-2019</a> |  |
| <a href="#">RNF111</a> | <a href="#">ABI1</a>     | <a href="#">0.007820658</a>  | <a href="#">Co-expression</a> | <a href="#">Zlotnik-2019</a> |  |
| <a href="#">RALB</a>   | <a href="#">NPEPPS</a>   | <a href="#">0.021908162</a>  | <a href="#">Co-expression</a> | <a href="#">Zlotnik-2019</a> |  |
| <a href="#">RALB</a>   | <a href="#">ABI1</a>     | <a href="#">0.029890688</a>  | <a href="#">Co-expression</a> | <a href="#">Zlotnik-2019</a> |  |
| <a href="#">RALB</a>   | <a href="#">VPS4B</a>    | <a href="#">0.0103175</a>    | <a href="#">Co-expression</a> | <a href="#">Zlotnik-2019</a> |  |
| <a href="#">RALB</a>   | <a href="#">RELCH</a>    | <a href="#">0.020367647</a>  | <a href="#">Co-expression</a> | <a href="#">Zlotnik-2019</a> |  |
| <a href="#">DCAF16</a> | <a href="#">WAC</a>      | <a href="#">0.01693839</a>   | <a href="#">Co-expression</a> | <a href="#">Brown-2019</a>   |  |
| <a href="#">PLAGL2</a> | <a href="#">DCAF16</a>   | <a href="#">0.0098297475</a> | <a href="#">Co-expression</a> | <a href="#">Brown-2019</a>   |  |
| <a href="#">NSD2</a>   | <a href="#">DCAF16</a>   | <a href="#">0.013989579</a>  | <a href="#">Co-expression</a> | <a href="#">Brown-2019</a>   |  |
| <a href="#">NSD2</a>   | <a href="#">PLAGL2</a>   | <a href="#">0.0083880285</a> | <a href="#">Co-expression</a> | <a href="#">Brown-2019</a>   |  |
| <a href="#">PTBP3</a>  | <a href="#">CDKN2B</a>   | <a href="#">0.009976122</a>  | <a href="#">Co-expression</a> | <a href="#">Brown-2019</a>   |  |
| <a href="#">DYRK1A</a> | <a href="#">RNF138</a>   | <a href="#">0.011046242</a>  | <a href="#">Co-expression</a> | <a href="#">Brown-2019</a>   |  |
| <a href="#">RECQL4</a> | <a href="#">NSD2</a>     | <a href="#">0.009081764</a>  | <a href="#">Co-expression</a> | <a href="#">Brown-2019</a>   |  |
| <a href="#">RECQL4</a> | <a href="#">MYBL2</a>    | <a href="#">0.006867876</a>  | <a href="#">Co-expression</a> | <a href="#">Brown-2019</a>   |  |
| <a href="#">VTA1</a>   | <a href="#">ABI1</a>     | <a href="#">0.008112838</a>  | <a href="#">Co-expression</a> | <a href="#">Brown-2019</a>   |  |
| <a href="#">TOP2A</a>  | <a href="#">NSD2</a>     | <a href="#">0.006955337</a>  | <a href="#">Co-expression</a> | <a href="#">Brown-2019</a>   |  |
| <a href="#">TOP2A</a>  | <a href="#">MYBL2</a>    | <a href="#">0.0056763375</a> | <a href="#">Co-expression</a> | <a href="#">Brown-2019</a>   |  |
| <a href="#">TOP2A</a>  | <a href="#">RECQL4</a>   | <a href="#">0.0066834856</a> | <a href="#">Co-expression</a> | <a href="#">Brown-2019</a>   |  |
| <a href="#">RNF111</a> | <a href="#">DMXL1</a>    | <a href="#">0.006378078</a>  | <a href="#">Co-expression</a> | <a href="#">Brown-2019</a>   |  |
| <a href="#">RNF111</a> | <a href="#">DYRK1A</a>   | <a href="#">0.014407489</a>  | <a href="#">Co-expression</a> | <a href="#">Brown-2019</a>   |  |



|                        |                           |                              |                               |                               |  |
|------------------------|---------------------------|------------------------------|-------------------------------|-------------------------------|--|
| <a href="#">RALB</a>   | <a href="#">CEACAM7</a>   | <a href="#">0.0168126</a>    | <a href="#">Co-expression</a> | <a href="#">hen-Brown-20</a>  |  |
| <a href="#">CDC25A</a> | <a href="#">PLAGL2</a>    | <a href="#">0.0077637723</a> | <a href="#">Co-expression</a> | <a href="#">hen-Brown-20</a>  |  |
| <a href="#">CDC25A</a> | <a href="#">NSD2</a>      | <a href="#">0.008300521</a>  | <a href="#">Co-expression</a> | <a href="#">hen-Brown-20</a>  |  |
| <a href="#">CDC25A</a> | <a href="#">TOP2A</a>     | <a href="#">0.0070079416</a> | <a href="#">Co-expression</a> | <a href="#">hen-Brown-20</a>  |  |
| <a href="#">E2F1</a>   | <a href="#">MYBL2</a>     | <a href="#">0.009568628</a>  | <a href="#">Co-expression</a> | <a href="#">hen-Brown-20</a>  |  |
| <a href="#">E2F1</a>   | <a href="#">RECQL4</a>    | <a href="#">0.011047635</a>  | <a href="#">Co-expression</a> | <a href="#">hen-Brown-20</a>  |  |
| <a href="#">E2F1</a>   | <a href="#">TOP2A</a>     | <a href="#">0.009636029</a>  | <a href="#">Co-expression</a> | <a href="#">hen-Brown-20</a>  |  |
| <a href="#">CNOT4</a>  | <a href="#">CPEB3</a>     | <a href="#">0.010363249</a>  | <a href="#">Co-expression</a> | <a href="#">ang-Maris-20</a>  |  |
| <a href="#">NSD2</a>   | <a href="#">PLAGL2</a>    | <a href="#">0.006462226</a>  | <a href="#">Co-expression</a> | <a href="#">ang-Maris-20</a>  |  |
| <a href="#">ABI1</a>   | <a href="#">CPEB3</a>     | <a href="#">0.013267917</a>  | <a href="#">Co-expression</a> | <a href="#">ang-Maris-20</a>  |  |
| <a href="#">VPS4B</a>  | <a href="#">PTBP3</a>     | <a href="#">0.008485339</a>  | <a href="#">Co-expression</a> | <a href="#">ang-Maris-20</a>  |  |
| <a href="#">GNAI3</a>  | <a href="#">PLAGL2</a>    | <a href="#">0.011169017</a>  | <a href="#">Co-expression</a> | <a href="#">ang-Maris-20</a>  |  |
| <a href="#">MYBL1</a>  | <a href="#">NSD2</a>      | <a href="#">0.011091582</a>  | <a href="#">Co-expression</a> | <a href="#">ang-Maris-20</a>  |  |
| <a href="#">MYBL2</a>  | <a href="#">NSD2</a>      | <a href="#">0.0053544967</a> | <a href="#">Co-expression</a> | <a href="#">ang-Maris-20</a>  |  |
| <a href="#">RECQL4</a> | <a href="#">MYBL2</a>     | <a href="#">0.008053301</a>  | <a href="#">Co-expression</a> | <a href="#">ang-Maris-20</a>  |  |
| <a href="#">TOP2A</a>  | <a href="#">MYBL1</a>     | <a href="#">0.012757425</a>  | <a href="#">Co-expression</a> | <a href="#">ang-Maris-20</a>  |  |
| <a href="#">TOP2A</a>  | <a href="#">MYBL2</a>     | <a href="#">0.006396861</a>  | <a href="#">Co-expression</a> | <a href="#">ang-Maris-20</a>  |  |
| <a href="#">CDC25A</a> | <a href="#">MYBL2</a>     | <a href="#">0.011774617</a>  | <a href="#">Co-expression</a> | <a href="#">ang-Maris-20</a>  |  |
| <a href="#">E2F1</a>   | <a href="#">TMPRSS11D</a> | <a href="#">0.016067887</a>  | <a href="#">Co-expression</a> | <a href="#">ang-Maris-20</a>  |  |
| <a href="#">E2F1</a>   | <a href="#">MYBL2</a>     | <a href="#">0.009872481</a>  | <a href="#">Co-expression</a> | <a href="#">ang-Maris-20</a>  |  |
| <a href="#">XPO7</a>   | <a href="#">WAC</a>       | <a href="#">0.013202282</a>  | <a href="#">Co-expression</a> | <a href="#">ang-Cheung-20</a> |  |
| <a href="#">DMXL1</a>  | <a href="#">CPEB3</a>     | <a href="#">0.0085755065</a> | <a href="#">Co-expression</a> | <a href="#">ang-Cheung-20</a> |  |
| <a href="#">ABI1</a>   | <a href="#">DMXL1</a>     | <a href="#">0.0042838175</a> | <a href="#">Co-expression</a> | <a href="#">ang-Cheung-20</a> |  |
| <a href="#">VPS4B</a>  | <a href="#">CPEB3</a>     | <a href="#">0.010885908</a>  | <a href="#">Co-expression</a> | <a href="#">ang-Cheung-20</a> |  |
| <a href="#">VPS4B</a>  | <a href="#">ABI1</a>      | <a href="#">0.005750587</a>  | <a href="#">Co-expression</a> | <a href="#">ang-Cheung-20</a> |  |
| <a href="#">GNAI3</a>  | <a href="#">C12orf29</a>  | <a href="#">0.00961275</a>   | <a href="#">Co-expression</a> | <a href="#">ang-Cheung-20</a> |  |
| <a href="#">LIN37</a>  | <a href="#">C12orf29</a>  | <a href="#">0.007040282</a>  | <a href="#">Co-expression</a> | <a href="#">ang-Cheung-20</a> |  |
| <a href="#">DYRK1A</a> | <a href="#">VPS4B</a>     | <a href="#">0.011233574</a>  | <a href="#">Co-expression</a> | <a href="#">ang-Cheung-20</a> |  |
| <a href="#">DDB1</a>   | <a href="#">OVOL1</a>     | <a href="#">0.009849815</a>  | <a href="#">Co-expression</a> | <a href="#">ang-Cheung-20</a> |  |
| <a href="#">TOP2A</a>  | <a href="#">NSD2</a>      | <a href="#">0.013581877</a>  | <a href="#">Co-expression</a> | <a href="#">ang-Cheung-20</a> |  |
| <a href="#">TOP2A</a>  | <a href="#">MYBL1</a>     | <a href="#">0.0072662365</a> | <a href="#">Co-expression</a> | <a href="#">ang-Cheung-20</a> |  |
| <a href="#">TOP2A</a>  | <a href="#">RECQL4</a>    | <a href="#">0.0078024035</a> | <a href="#">Co-expression</a> | <a href="#">ang-Cheung-20</a> |  |
| <a href="#">RNF111</a> | <a href="#">GNAI3</a>     | <a href="#">0.030458715</a>  | <a href="#">Co-expression</a> | <a href="#">ang-Cheung-20</a> |  |

|                        |                          |                              |                               |                                |  |
|------------------------|--------------------------|------------------------------|-------------------------------|--------------------------------|--|
| <a href="#">CPEB3</a>  | <a href="#">C12orf29</a> | <a href="#">0.0096941395</a> | <a href="#">Co-expression</a> | <a href="#">d-Nevins-2006</a>  |  |
| <a href="#">DMXL1</a>  | <a href="#">CPEB3</a>    | <a href="#">0.011898731</a>  | <a href="#">Co-expression</a> | <a href="#">d-Nevins-2006</a>  |  |
| <a href="#">MYO6</a>   | <a href="#">DMXL1</a>    | <a href="#">0.024418302</a>  | <a href="#">Co-expression</a> | <a href="#">d-Nevins-2006</a>  |  |
| <a href="#">RBBP4</a>  | <a href="#">NSD2</a>     | <a href="#">0.021445418</a>  | <a href="#">Co-expression</a> | <a href="#">d-Nevins-2006</a>  |  |
| <a href="#">DYRK1A</a> | <a href="#">ABI1</a>     | <a href="#">0.015365416</a>  | <a href="#">Co-expression</a> | <a href="#">d-Nevins-2006</a>  |  |
| <a href="#">TOP2A</a>  | <a href="#">MYBL2</a>    | <a href="#">0.008425637</a>  | <a href="#">Co-expression</a> | <a href="#">d-Nevins-2006</a>  |  |
| <a href="#">PLAGL2</a> | <a href="#">CDKN2B</a>   | <a href="#">0.02327909</a>   | <a href="#">Co-expression</a> | <a href="#">swamy-Golub</a>    |  |
| <a href="#">ABI1</a>   | <a href="#">PTBP3</a>    | <a href="#">0.009284825</a>  | <a href="#">Co-expression</a> | <a href="#">swamy-Golub</a>    |  |
| <a href="#">RNF138</a> | <a href="#">ABI1</a>     | <a href="#">0.003808728</a>  | <a href="#">Co-expression</a> | <a href="#">swamy-Golub</a>    |  |
| <a href="#">DDB1</a>   | <a href="#">RBBP4</a>    | <a href="#">0.005874628</a>  | <a href="#">Co-expression</a> | <a href="#">swamy-Golub</a>    |  |
| <a href="#">VTA1</a>   | <a href="#">ABI1</a>     | <a href="#">0.006134585</a>  | <a href="#">Co-expression</a> | <a href="#">swamy-Golub</a>    |  |
| <a href="#">RNF111</a> | <a href="#">RELCH</a>    | <a href="#">0.013163213</a>  | <a href="#">Co-expression</a> | <a href="#">swamy-Golub</a>    |  |
| <a href="#">RNF138</a> | <a href="#">C12orf29</a> | <a href="#">0.01146754</a>   | <a href="#">Co-expression</a> | <a href="#">bin-Giordano-</a>  |  |
| <a href="#">ESRP1</a>  | <a href="#">OVOL1</a>    | <a href="#">0.011730528</a>  | <a href="#">Co-expression</a> | <a href="#">bin-Giordano-</a>  |  |
| <a href="#">ESRP1</a>  | <a href="#">PTBP3</a>    | <a href="#">0.012982073</a>  | <a href="#">Co-expression</a> | <a href="#">bin-Giordano-</a>  |  |
| <a href="#">VPS4B</a>  | <a href="#">DMXL1</a>    | <a href="#">0.01086625</a>   | <a href="#">Co-expression</a> | <a href="#">bin-Giordano-</a>  |  |
| <a href="#">MYBL1</a>  | <a href="#">NSD2</a>     | <a href="#">0.0068347766</a> | <a href="#">Co-expression</a> | <a href="#">bin-Giordano-</a>  |  |
| <a href="#">RBBP4</a>  | <a href="#">XPO7</a>     | <a href="#">0.012448914</a>  | <a href="#">Co-expression</a> | <a href="#">bin-Giordano-</a>  |  |
| <a href="#">RECQL4</a> | <a href="#">LIN37</a>    | <a href="#">0.016968794</a>  | <a href="#">Co-expression</a> | <a href="#">bin-Giordano-</a>  |  |
| <a href="#">TOP2A</a>  | <a href="#">NSD2</a>     | <a href="#">0.004781825</a>  | <a href="#">Co-expression</a> | <a href="#">bin-Giordano-</a>  |  |
| <a href="#">TOP2A</a>  | <a href="#">MYBL1</a>    | <a href="#">0.004119247</a>  | <a href="#">Co-expression</a> | <a href="#">bin-Giordano-</a>  |  |
| <a href="#">RBL1</a>   | <a href="#">RECQL4</a>   | <a href="#">0.012895215</a>  | <a href="#">Co-expression</a> | <a href="#">bin-Giordano-</a>  |  |
| <a href="#">RNF111</a> | <a href="#">VPS4B</a>    | <a href="#">0.013588887</a>  | <a href="#">Co-expression</a> | <a href="#">bin-Giordano-</a>  |  |
| <a href="#">RALB</a>   | <a href="#">PTBP3</a>    | <a href="#">0.02232499</a>   | <a href="#">Co-expression</a> | <a href="#">bin-Giordano-</a>  |  |
| <a href="#">CDC25A</a> | <a href="#">MYBL2</a>    | <a href="#">0.012118931</a>  | <a href="#">Co-expression</a> | <a href="#">bin-Giordano-</a>  |  |
| <a href="#">E2F1</a>   | <a href="#">XPO7</a>     | <a href="#">0.009310313</a>  | <a href="#">Co-expression</a> | <a href="#">bin-Giordano-</a>  |  |
| <a href="#">E2F1</a>   | <a href="#">RECQL4</a>   | <a href="#">0.010547243</a>  | <a href="#">Co-expression</a> | <a href="#">bin-Giordano-</a>  |  |
| <a href="#">E2F1</a>   | <a href="#">CDC25A</a>   | <a href="#">0.012645964</a>  | <a href="#">Co-expression</a> | <a href="#">bin-Giordano-</a>  |  |
| <a href="#">RNF138</a> | <a href="#">DMXL1</a>    | <a href="#">0.0074333134</a> | <a href="#">Co-expression</a> | <a href="#">js-Rutgeerts-2</a> |  |
| <a href="#">ESRP1</a>  | <a href="#">NSD2</a>     | <a href="#">0.006375138</a>  | <a href="#">Co-expression</a> | <a href="#">js-Rutgeerts-2</a> |  |
| <a href="#">ESRP1</a>  | <a href="#">CEACAM7</a>  | <a href="#">0.0025032891</a> | <a href="#">Co-expression</a> | <a href="#">js-Rutgeerts-2</a> |  |
| <a href="#">LIN54</a>  | <a href="#">RNF138</a>   | <a href="#">0.007996068</a>  | <a href="#">Co-expression</a> | <a href="#">js-Rutgeerts-2</a> |  |
| <a href="#">VPS4B</a>  | <a href="#">LRRC1</a>    | <a href="#">0.0145602925</a> | <a href="#">Co-expression</a> | <a href="#">js-Rutgeerts-2</a> |  |

|                        |                        |                              |                               |                                |  |
|------------------------|------------------------|------------------------------|-------------------------------|--------------------------------|--|
| <a href="#">RELCH</a>  | <a href="#">ESRP1</a>  | <a href="#">0.006304463</a>  | <a href="#">Co-expression</a> | <a href="#">js-Rutgeerts-2</a> |  |
| <a href="#">RALB</a>   | <a href="#">NPEPPS</a> | <a href="#">0.009858193</a>  | <a href="#">Co-expression</a> | <a href="#">js-Rutgeerts-2</a> |  |
| <a href="#">RALB</a>   | <a href="#">GNAI3</a>  | <a href="#">0.013574837</a>  | <a href="#">Co-expression</a> | <a href="#">js-Rutgeerts-2</a> |  |
| <a href="#">ABI1</a>   | <a href="#">WAC</a>    | <a href="#">0.010881725</a>  | <a href="#">Co-expression</a> | <a href="#">ang-de Kok-20</a>  |  |
| <a href="#">RNF138</a> | <a href="#">PTBP3</a>  | <a href="#">0.016972717</a>  | <a href="#">Co-expression</a> | <a href="#">ang-de Kok-20</a>  |  |
| <a href="#">MYBL2</a>  | <a href="#">LIN9</a>   | <a href="#">0.010876305</a>  | <a href="#">Co-expression</a> | <a href="#">ang-de Kok-20</a>  |  |
| <a href="#">MYBL2</a>  | <a href="#">MYBL1</a>  | <a href="#">0.013747675</a>  | <a href="#">Co-expression</a> | <a href="#">ang-de Kok-20</a>  |  |
| <a href="#">DDB1</a>   | <a href="#">MYBL2</a>  | <a href="#">0.009490002</a>  | <a href="#">Co-expression</a> | <a href="#">ang-de Kok-20</a>  |  |
| <a href="#">RECQL4</a> | <a href="#">MYBL1</a>  | <a href="#">0.008707146</a>  | <a href="#">Co-expression</a> | <a href="#">ang-de Kok-20</a>  |  |
| <a href="#">RECQL4</a> | <a href="#">MAU2</a>   | <a href="#">0.0048077498</a> | <a href="#">Co-expression</a> | <a href="#">ang-de Kok-20</a>  |  |
| <a href="#">RBL1</a>   | <a href="#">LIN52</a>  | <a href="#">0.022730982</a>  | <a href="#">Co-expression</a> | <a href="#">ang-de Kok-20</a>  |  |
| <a href="#">RNF111</a> | <a href="#">CNOT4</a>  | <a href="#">0.022585403</a>  | <a href="#">Co-expression</a> | <a href="#">ang-de Kok-20</a>  |  |
| <a href="#">RNF111</a> | <a href="#">VPS4B</a>  | <a href="#">0.022444284</a>  | <a href="#">Co-expression</a> | <a href="#">ang-de Kok-20</a>  |  |
| <a href="#">CDC25A</a> | <a href="#">LIN52</a>  | <a href="#">0.015007587</a>  | <a href="#">Co-expression</a> | <a href="#">ang-de Kok-20</a>  |  |
| <a href="#">E2F1</a>   | <a href="#">RBBP4</a>  | <a href="#">0.009021838</a>  | <a href="#">Co-expression</a> | <a href="#">ang-de Kok-20</a>  |  |
| <a href="#">E2F1</a>   | <a href="#">RECQL4</a> | <a href="#">0.002568588</a>  | <a href="#">Co-expression</a> | <a href="#">ang-de Kok-20</a>  |  |
| <a href="#">E2F1</a>   | <a href="#">CDC25A</a> | <a href="#">0.005476635</a>  | <a href="#">Co-expression</a> | <a href="#">ang-de Kok-20</a>  |  |
| <a href="#">XPO7</a>   | <a href="#">CNOT4</a>  | <a href="#">0.007284655</a>  | <a href="#">Co-expression</a> | <a href="#">ocenti-Brown-2</a> |  |
| <a href="#">GNAI3</a>  | <a href="#">ABI1</a>   | <a href="#">0.008847705</a>  | <a href="#">Co-expression</a> | <a href="#">ocenti-Brown-2</a> |  |
| <a href="#">GNAI3</a>  | <a href="#">RNF138</a> | <a href="#">0.005960107</a>  | <a href="#">Co-expression</a> | <a href="#">ocenti-Brown-2</a> |  |
| <a href="#">GNAI3</a>  | <a href="#">VPS4B</a>  | <a href="#">0.00716698</a>   | <a href="#">Co-expression</a> | <a href="#">ocenti-Brown-2</a> |  |
| <a href="#">MAU2</a>   | <a href="#">DCAF16</a> | <a href="#">0.016808547</a>  | <a href="#">Co-expression</a> | <a href="#">ocenti-Brown-2</a> |  |
| <a href="#">TOP2A</a>  | <a href="#">NSD2</a>   | <a href="#">0.007172603</a>  | <a href="#">Co-expression</a> | <a href="#">ocenti-Brown-2</a> |  |
| <a href="#">TOP2A</a>  | <a href="#">RECQL4</a> | <a href="#">0.009080315</a>  | <a href="#">Co-expression</a> | <a href="#">ocenti-Brown-2</a> |  |
| <a href="#">RNF111</a> | <a href="#">DCAF16</a> | <a href="#">0.013473146</a>  | <a href="#">Co-expression</a> | <a href="#">ocenti-Brown-2</a> |  |
| <a href="#">RNF111</a> | <a href="#">GNAI3</a>  | <a href="#">0.0037349486</a> | <a href="#">Co-expression</a> | <a href="#">ocenti-Brown-2</a> |  |
| <a href="#">CDC25A</a> | <a href="#">RECQL4</a> | <a href="#">0.02032586</a>   | <a href="#">Co-expression</a> | <a href="#">ocenti-Brown-2</a> |  |
| <a href="#">E2F1</a>   | <a href="#">NSD2</a>   | <a href="#">0.013699018</a>  | <a href="#">Co-expression</a> | <a href="#">ocenti-Brown-2</a> |  |
| <a href="#">E2F1</a>   | <a href="#">RECQL4</a> | <a href="#">0.01773359</a>   | <a href="#">Co-expression</a> | <a href="#">ocenti-Brown-2</a> |  |
| <a href="#">E2F1</a>   | <a href="#">TOP2A</a>  | <a href="#">0.007254075</a>  | <a href="#">Co-expression</a> | <a href="#">ocenti-Brown-2</a> |  |
| <a href="#">E2F1</a>   | <a href="#">RBL1</a>   | <a href="#">0.013772248</a>  | <a href="#">Co-expression</a> | <a href="#">ocenti-Brown-2</a> |  |
| <a href="#">E2F1</a>   | <a href="#">CDC25A</a> | <a href="#">0.021636382</a>  | <a href="#">Co-expression</a> | <a href="#">ocenti-Brown-2</a> |  |
| <a href="#">MYO6</a>   | <a href="#">NSD2</a>   | <a href="#">0.009504871</a>  | <a href="#">Co-expression</a> | <a href="#">on-Shaughnes</a>   |  |

|                         |                         |                              |                                 |                               |  |
|-------------------------|-------------------------|------------------------------|---------------------------------|-------------------------------|--|
| <a href="#">VPS4B</a>   | <a href="#">PTBP3</a>   | <a href="#">0.01384683</a>   | <a href="#">Co-expression</a>   | <a href="#">on-Shaughnes</a>  |  |
| <a href="#">MYBL1</a>   | <a href="#">NSD2</a>    | <a href="#">0.00996977</a>   | <a href="#">Co-expression</a>   | <a href="#">on-Shaughnes</a>  |  |
| <a href="#">TOP2A</a>   | <a href="#">MYBL2</a>   | <a href="#">0.0041000918</a> | <a href="#">Co-expression</a>   | <a href="#">on-Shaughnes</a>  |  |
| <a href="#">CDC25A</a>  | <a href="#">MYBL2</a>   | <a href="#">0.0110226935</a> | <a href="#">Co-expression</a>   | <a href="#">on-Shaughnes</a>  |  |
| <a href="#">CDC25A</a>  | <a href="#">TOP2A</a>   | <a href="#">0.008536423</a>  | <a href="#">Co-expression</a>   | <a href="#">on-Shaughnes</a>  |  |
| <a href="#">PLAGL2</a>  | <a href="#">CPEB3</a>   | <a href="#">0.015035562</a>  | <a href="#">Co-expression</a>   | <a href="#">ieger-Chu-200</a> |  |
| <a href="#">XPO7</a>    | <a href="#">NSD2</a>    | <a href="#">0.0044691483</a> | <a href="#">Co-expression</a>   | <a href="#">ieger-Chu-200</a> |  |
| <a href="#">RBBP4</a>   | <a href="#">NSD2</a>    | <a href="#">0.0077157044</a> | <a href="#">Co-expression</a>   | <a href="#">ieger-Chu-200</a> |  |
| <a href="#">MYBL2</a>   | <a href="#">NSD2</a>    | <a href="#">0.0041634957</a> | <a href="#">Co-expression</a>   | <a href="#">ieger-Chu-200</a> |  |
| <a href="#">DYRK1A</a>  | <a href="#">ABI1</a>    | <a href="#">0.014046682</a>  | <a href="#">Co-expression</a>   | <a href="#">ieger-Chu-200</a> |  |
| <a href="#">DDB1</a>    | <a href="#">NSD2</a>    | <a href="#">0.0058653946</a> | <a href="#">Co-expression</a>   | <a href="#">ieger-Chu-200</a> |  |
| <a href="#">TOP2A</a>   | <a href="#">XPO7</a>    | <a href="#">0.00877425</a>   | <a href="#">Co-expression</a>   | <a href="#">ieger-Chu-200</a> |  |
| <a href="#">RBL1</a>    | <a href="#">NSD2</a>    | <a href="#">0.00518808</a>   | <a href="#">Co-expression</a>   | <a href="#">ieger-Chu-200</a> |  |
| <a href="#">CDC25A</a>  | <a href="#">MYBL2</a>   | <a href="#">0.013165738</a>  | <a href="#">Co-expression</a>   | <a href="#">ieger-Chu-200</a> |  |
| <a href="#">MYO6</a>    | <a href="#">LRRC1</a>   | <a href="#">0.0046979245</a> | <a href="#">Co-expression</a>   | <a href="#">llon-McKay-20</a> |  |
| <a href="#">VPS4B</a>   | <a href="#">ABI1</a>    | <a href="#">0.017125152</a>  | <a href="#">Co-expression</a>   | <a href="#">llon-McKay-20</a> |  |
| <a href="#">RBBP4</a>   | <a href="#">GNAI3</a>   | <a href="#">0.0097209215</a> | <a href="#">Co-expression</a>   | <a href="#">llon-McKay-20</a> |  |
| <a href="#">DDB1</a>    | <a href="#">NPEPPS</a>  | <a href="#">0.017561503</a>  | <a href="#">Co-expression</a>   | <a href="#">llon-McKay-20</a> |  |
| <a href="#">MAU2</a>    | <a href="#">DCAF16</a>  | <a href="#">0.009380774</a>  | <a href="#">Co-expression</a>   | <a href="#">llon-McKay-20</a> |  |
| <a href="#">MAU2</a>    | <a href="#">MICAL3</a>  | <a href="#">0.010434723</a>  | <a href="#">Co-expression</a>   | <a href="#">llon-McKay-20</a> |  |
| <a href="#">VTA1</a>    | <a href="#">GNAI3</a>   | <a href="#">0.009623963</a>  | <a href="#">Co-expression</a>   | <a href="#">llon-McKay-20</a> |  |
| <a href="#">RBL1</a>    | <a href="#">RECQL4</a>  | <a href="#">0.011747229</a>  | <a href="#">Co-expression</a>   | <a href="#">llon-McKay-20</a> |  |
| <a href="#">RELCH</a>   | <a href="#">GNAI3</a>   | <a href="#">0.008382405</a>  | <a href="#">Co-expression</a>   | <a href="#">llon-McKay-20</a> |  |
| <a href="#">RNF111</a>  | <a href="#">ABI1</a>    | <a href="#">0.005608169</a>  | <a href="#">Co-expression</a>   | <a href="#">llon-McKay-20</a> |  |
| <a href="#">E2F1</a>    | <a href="#">RECQL4</a>  | <a href="#">0.0058196057</a> | <a href="#">Co-expression</a>   | <a href="#">llon-McKay-20</a> |  |
| <a href="#">E2F1</a>    | <a href="#">RBL1</a>    | <a href="#">0.013387715</a>  | <a href="#">Co-expression</a>   | <a href="#">llon-McKay-20</a> |  |
| <a href="#">CEACAM7</a> | <a href="#">LRRC1</a>   | <a href="#">0.019929463</a>  | <a href="#">Co-localization</a> | <a href="#">on-Shoemaker</a>  |  |
| <a href="#">ESRP1</a>   | <a href="#">LRRC1</a>   | <a href="#">0.011078517</a>  | <a href="#">Co-localization</a> | <a href="#">on-Shoemaker</a>  |  |
| <a href="#">ESRP1</a>   | <a href="#">CEACAM7</a> | <a href="#">0.00807846</a>   | <a href="#">Co-localization</a> | <a href="#">on-Shoemaker</a>  |  |
| <a href="#">VPS4B</a>   | <a href="#">CEACAM7</a> | <a href="#">0.014546804</a>  | <a href="#">Co-localization</a> | <a href="#">on-Shoemaker</a>  |  |
| <a href="#">VPS4B</a>   | <a href="#">ESRP1</a>   | <a href="#">0.009720429</a>  | <a href="#">Co-localization</a> | <a href="#">on-Shoemaker</a>  |  |
| <a href="#">GNAI3</a>   | <a href="#">PTBP3</a>   | <a href="#">0.013962214</a>  | <a href="#">Co-localization</a> | <a href="#">on-Shoemaker</a>  |  |
| <a href="#">RBBP4</a>   | <a href="#">NSD2</a>    | <a href="#">0.0076454827</a> | <a href="#">Co-localization</a> | <a href="#">on-Shoemaker</a>  |  |

|                        |                          |                               |                                      |                                |  |
|------------------------|--------------------------|-------------------------------|--------------------------------------|--------------------------------|--|
| <a href="#">RBL1</a>   | <a href="#">NSD2</a>     | <a href="#">0.010254401</a>   | <a href="#">Co-localization</a>      | <a href="#">on-Shoemaker</a>   |  |
| <a href="#">RBL1</a>   | <a href="#">MYBL2</a>    | <a href="#">0.010436047</a>   | <a href="#">Co-localization</a>      | <a href="#">on-Shoemaker</a>   |  |
| <a href="#">RNF111</a> | <a href="#">WAC</a>      | <a href="#">0.024710106</a>   | <a href="#">Co-localization</a>      | <a href="#">on-Shoemaker</a>   |  |
| <a href="#">RNF111</a> | <a href="#">DMXL1</a>    | <a href="#">0.02159738</a>    | <a href="#">Co-localization</a>      | <a href="#">on-Shoemaker</a>   |  |
| <a href="#">RNF111</a> | <a href="#">L3MBTL2</a>  | <a href="#">0.028319264</a>   | <a href="#">Co-localization</a>      | <a href="#">on-Shoemaker</a>   |  |
| <a href="#">RALB</a>   | <a href="#">MYO6</a>     | <a href="#">0.018514829</a>   | <a href="#">Co-localization</a>      | <a href="#">on-Shoemaker</a>   |  |
| <a href="#">E2F1</a>   | <a href="#">RBBP4</a>    | <a href="#">0.0075191325</a>  | <a href="#">Co-localization</a>      | <a href="#">on-Shoemaker</a>   |  |
| <a href="#">E2F1</a>   | <a href="#">RBL1</a>     | <a href="#">0.010516205</a>   | <a href="#">Co-localization</a>      | <a href="#">on-Shoemaker</a>   |  |
| <a href="#">WAC</a>    | <a href="#">LRRC1</a>    | <a href="#">0.0012887164</a>  | <a href="#">Genetic Interactions</a> | <a href="#">Lin-Smith-2010</a> |  |
| <a href="#">NSD2</a>   | <a href="#">CNOT4</a>    | <a href="#">0.00088065525</a> | <a href="#">Genetic Interactions</a> | <a href="#">Lin-Smith-2010</a> |  |
| <a href="#">PTBP3</a>  | <a href="#">WAC</a>      | <a href="#">0.00097053056</a> | <a href="#">Genetic Interactions</a> | <a href="#">Lin-Smith-2010</a> |  |
| <a href="#">XPO7</a>   | <a href="#">LRRC1</a>    | <a href="#">0.0012810407</a>  | <a href="#">Genetic Interactions</a> | <a href="#">Lin-Smith-2010</a> |  |
| <a href="#">DMXL1</a>  | <a href="#">LIN9</a>     | <a href="#">0.0014897025</a>  | <a href="#">Genetic Interactions</a> | <a href="#">Lin-Smith-2010</a> |  |
| <a href="#">DMXL1</a>  | <a href="#">C12orf29</a> | <a href="#">0.0022103342</a>  | <a href="#">Genetic Interactions</a> | <a href="#">Lin-Smith-2010</a> |  |
| <a href="#">DMXL1</a>  | <a href="#">OVOL1</a>    | <a href="#">0.0036268476</a>  | <a href="#">Genetic Interactions</a> | <a href="#">Lin-Smith-2010</a> |  |
| <a href="#">DMXL1</a>  | <a href="#">CNOT4</a>    | <a href="#">0.0011811948</a>  | <a href="#">Genetic Interactions</a> | <a href="#">Lin-Smith-2010</a> |  |
| <a href="#">RNF138</a> | <a href="#">LIN9</a>     | <a href="#">0.0019133738</a>  | <a href="#">Genetic Interactions</a> | <a href="#">Lin-Smith-2010</a> |  |
| <a href="#">VPS4B</a>  | <a href="#">CPEB3</a>    | <a href="#">0.001302679</a>   | <a href="#">Genetic Interactions</a> | <a href="#">Lin-Smith-2010</a> |  |
| <a href="#">LIN37</a>  | <a href="#">XPO7</a>     | <a href="#">0.0020766188</a>  | <a href="#">Genetic Interactions</a> | <a href="#">Lin-Smith-2010</a> |  |
| <a href="#">DYRK1A</a> | <a href="#">C12orf29</a> | <a href="#">0.0010314529</a>  | <a href="#">Genetic Interactions</a> | <a href="#">Lin-Smith-2010</a> |  |
| <a href="#">DYRK1A</a> | <a href="#">CPEB3</a>    | <a href="#">0.0006483199</a>  | <a href="#">Genetic Interactions</a> | <a href="#">Lin-Smith-2010</a> |  |
| <a href="#">DYRK1A</a> | <a href="#">PTBP3</a>    | <a href="#">0.00043667635</a> | <a href="#">Genetic Interactions</a> | <a href="#">Lin-Smith-2010</a> |  |
| <a href="#">DYRK1A</a> | <a href="#">RNF138</a>   | <a href="#">0.00088413444</a> | <a href="#">Genetic Interactions</a> | <a href="#">Lin-Smith-2010</a> |  |
| <a href="#">DYRK1A</a> | <a href="#">RBBP4</a>    | <a href="#">0.00044498104</a> | <a href="#">Genetic Interactions</a> | <a href="#">Lin-Smith-2010</a> |  |
| <a href="#">DDB1</a>   | <a href="#">WAC</a>      | <a href="#">0.002527239</a>   | <a href="#">Genetic Interactions</a> | <a href="#">Lin-Smith-2010</a> |  |
| <a href="#">MICAL3</a> | <a href="#">CDKN2B</a>   | <a href="#">0.0031327952</a>  | <a href="#">Genetic Interactions</a> | <a href="#">Lin-Smith-2010</a> |  |
| <a href="#">MICAL3</a> | <a href="#">DMXL1</a>    | <a href="#">0.0021905967</a>  | <a href="#">Genetic Interactions</a> | <a href="#">Lin-Smith-2010</a> |  |
| <a href="#">MAU2</a>   | <a href="#">DMXL1</a>    | <a href="#">0.004889198</a>   | <a href="#">Genetic Interactions</a> | <a href="#">Lin-Smith-2010</a> |  |
| <a href="#">TOP2A</a>  | <a href="#">MYO6</a>     | <a href="#">0.0021287168</a>  | <a href="#">Genetic Interactions</a> | <a href="#">Lin-Smith-2010</a> |  |
| <a href="#">RBL1</a>   | <a href="#">LIN9</a>     | <a href="#">0.0017601575</a>  | <a href="#">Genetic Interactions</a> | <a href="#">Lin-Smith-2010</a> |  |
| <a href="#">RBL1</a>   | <a href="#">RNF138</a>   | <a href="#">0.0022386124</a>  | <a href="#">Genetic Interactions</a> | <a href="#">Lin-Smith-2010</a> |  |
| <a href="#">RELCH</a>  | <a href="#">PTBP3</a>    | <a href="#">0.00095425546</a> | <a href="#">Genetic Interactions</a> | <a href="#">Lin-Smith-2010</a> |  |
| <a href="#">RNF111</a> | <a href="#">DYRK1A</a>   | <a href="#">0.00068071636</a> | <a href="#">Genetic Interactions</a> | <a href="#">Lin-Smith-2010</a> |  |

|                        |                           |                               |                                      |                                |  |
|------------------------|---------------------------|-------------------------------|--------------------------------------|--------------------------------|--|
| <a href="#">RALB</a>   | <a href="#">NPEPPS</a>    | <a href="#">0.0021395036</a>  | <a href="#">Genetic Interactions</a> | <a href="#">Lin-Smith-2010</a> |  |
| <a href="#">RALB</a>   | <a href="#">TMPRSS11D</a> | <a href="#">0.0019826521</a>  | <a href="#">Genetic Interactions</a> | <a href="#">Lin-Smith-2010</a> |  |
| <a href="#">RALB</a>   | <a href="#">DYRK1A</a>    | <a href="#">0.00050430605</a> | <a href="#">Genetic Interactions</a> | <a href="#">Lin-Smith-2010</a> |  |
| <a href="#">E2F1</a>   | <a href="#">XPO7</a>      | <a href="#">0.0023431063</a>  | <a href="#">Genetic Interactions</a> | <a href="#">Lin-Smith-2010</a> |  |
| <a href="#">VPS4A</a>  | <a href="#">CNOT4</a>     | <a href="#">0.0019036788</a>  | <a href="#">Genetic Interactions</a> | <a href="#">Lin-Smith-2010</a> |  |
| <a href="#">LIN54</a>  | <a href="#">LIN9</a>      | <a href="#">0.089336544</a>   | <a href="#">Pathway</a>              | <a href="#">REACTOME</a>       |  |
| <a href="#">LIN52</a>  | <a href="#">LIN9</a>      | <a href="#">0.089336544</a>   | <a href="#">Pathway</a>              | <a href="#">REACTOME</a>       |  |
| <a href="#">LIN52</a>  | <a href="#">LIN54</a>     | <a href="#">0.089336544</a>   | <a href="#">Pathway</a>              | <a href="#">REACTOME</a>       |  |
| <a href="#">LIN37</a>  | <a href="#">LIN9</a>      | <a href="#">0.089336544</a>   | <a href="#">Pathway</a>              | <a href="#">REACTOME</a>       |  |
| <a href="#">LIN37</a>  | <a href="#">LIN54</a>     | <a href="#">0.089336544</a>   | <a href="#">Pathway</a>              | <a href="#">REACTOME</a>       |  |
| <a href="#">LIN37</a>  | <a href="#">LIN52</a>     | <a href="#">0.089336544</a>   | <a href="#">Pathway</a>              | <a href="#">REACTOME</a>       |  |
| <a href="#">RBBP4</a>  | <a href="#">LIN9</a>      | <a href="#">0.05614493</a>    | <a href="#">Pathway</a>              | <a href="#">REACTOME</a>       |  |
| <a href="#">RBBP4</a>  | <a href="#">LIN54</a>     | <a href="#">0.05614493</a>    | <a href="#">Pathway</a>              | <a href="#">REACTOME</a>       |  |
| <a href="#">RBBP4</a>  | <a href="#">LIN52</a>     | <a href="#">0.05614493</a>    | <a href="#">Pathway</a>              | <a href="#">REACTOME</a>       |  |
| <a href="#">RBBP4</a>  | <a href="#">LIN37</a>     | <a href="#">0.05614493</a>    | <a href="#">Pathway</a>              | <a href="#">REACTOME</a>       |  |
| <a href="#">DYRK1A</a> | <a href="#">LIN9</a>      | <a href="#">0.17221223</a>    | <a href="#">Pathway</a>              | <a href="#">REACTOME</a>       |  |
| <a href="#">DYRK1A</a> | <a href="#">LIN54</a>     | <a href="#">0.17221223</a>    | <a href="#">Pathway</a>              | <a href="#">REACTOME</a>       |  |
| <a href="#">DYRK1A</a> | <a href="#">LIN52</a>     | <a href="#">0.17221223</a>    | <a href="#">Pathway</a>              | <a href="#">REACTOME</a>       |  |
| <a href="#">DYRK1A</a> | <a href="#">LIN37</a>     | <a href="#">0.17221223</a>    | <a href="#">Pathway</a>              | <a href="#">REACTOME</a>       |  |
| <a href="#">DYRK1A</a> | <a href="#">RBBP4</a>     | <a href="#">0.10822944</a>    | <a href="#">Pathway</a>              | <a href="#">REACTOME</a>       |  |
| <a href="#">VTA1</a>   | <a href="#">VPS4B</a>     | <a href="#">0.18933201</a>    | <a href="#">Pathway</a>              | <a href="#">REACTOME</a>       |  |
| <a href="#">TOP2A</a>  | <a href="#">LIN9</a>      | <a href="#">0.09858862</a>    | <a href="#">Pathway</a>              | <a href="#">REACTOME</a>       |  |
| <a href="#">TOP2A</a>  | <a href="#">LIN54</a>     | <a href="#">0.09858862</a>    | <a href="#">Pathway</a>              | <a href="#">REACTOME</a>       |  |
| <a href="#">TOP2A</a>  | <a href="#">LIN52</a>     | <a href="#">0.09858862</a>    | <a href="#">Pathway</a>              | <a href="#">REACTOME</a>       |  |
| <a href="#">TOP2A</a>  | <a href="#">LIN37</a>     | <a href="#">0.09858862</a>    | <a href="#">Pathway</a>              | <a href="#">REACTOME</a>       |  |
| <a href="#">TOP2A</a>  | <a href="#">RBBP4</a>     | <a href="#">0.061959546</a>   | <a href="#">Pathway</a>              | <a href="#">REACTOME</a>       |  |
| <a href="#">RBL1</a>   | <a href="#">LIN9</a>      | <a href="#">0.09421307</a>    | <a href="#">Pathway</a>              | <a href="#">REACTOME</a>       |  |
| <a href="#">RBL1</a>   | <a href="#">LIN54</a>     | <a href="#">0.09421307</a>    | <a href="#">Pathway</a>              | <a href="#">REACTOME</a>       |  |
| <a href="#">RBL1</a>   | <a href="#">LIN52</a>     | <a href="#">0.09421307</a>    | <a href="#">Pathway</a>              | <a href="#">REACTOME</a>       |  |
| <a href="#">RBL1</a>   | <a href="#">LIN37</a>     | <a href="#">0.09421307</a>    | <a href="#">Pathway</a>              | <a href="#">REACTOME</a>       |  |
| <a href="#">RBL1</a>   | <a href="#">TOP2A</a>     | <a href="#">0.103970185</a>   | <a href="#">Pathway</a>              | <a href="#">REACTOME</a>       |  |
| <a href="#">CDC25A</a> | <a href="#">LIN9</a>      | <a href="#">0.08592139</a>    | <a href="#">Pathway</a>              | <a href="#">REACTOME</a>       |  |
| <a href="#">CDC25A</a> | <a href="#">LIN54</a>     | <a href="#">0.08592139</a>    | <a href="#">Pathway</a>              | <a href="#">REACTOME</a>       |  |

|                         |                        |                             |                                       |                                 |  |
|-------------------------|------------------------|-----------------------------|---------------------------------------|---------------------------------|--|
| <a href="#">CDC25A</a>  | <a href="#">LIN52</a>  | <a href="#">0.08592139</a>  | <a href="#">Pathway</a>               | <a href="#">REACTOME</a>        |  |
| <a href="#">CDC25A</a>  | <a href="#">LIN37</a>  | <a href="#">0.08592139</a>  | <a href="#">Pathway</a>               | <a href="#">REACTOME</a>        |  |
| <a href="#">CDC25A</a>  | <a href="#">RBBP4</a>  | <a href="#">0.053998627</a> | <a href="#">Pathway</a>               | <a href="#">REACTOME</a>        |  |
| <a href="#">CDC25A</a>  | <a href="#">TOP2A</a>  | <a href="#">0.094819784</a> | <a href="#">Pathway</a>               | <a href="#">REACTOME</a>        |  |
| <a href="#">CDC25A</a>  | <a href="#">RBL1</a>   | <a href="#">0.0906115</a>   | <a href="#">Pathway</a>               | <a href="#">REACTOME</a>        |  |
| <a href="#">E2F1</a>    | <a href="#">LIN9</a>   | <a href="#">0.0822111</a>   | <a href="#">Pathway</a>               | <a href="#">REACTOME</a>        |  |
| <a href="#">E2F1</a>    | <a href="#">LIN54</a>  | <a href="#">0.0822111</a>   | <a href="#">Pathway</a>               | <a href="#">REACTOME</a>        |  |
| <a href="#">E2F1</a>    | <a href="#">LIN52</a>  | <a href="#">0.0822111</a>   | <a href="#">Pathway</a>               | <a href="#">REACTOME</a>        |  |
| <a href="#">E2F1</a>    | <a href="#">LIN37</a>  | <a href="#">0.0822111</a>   | <a href="#">Pathway</a>               | <a href="#">REACTOME</a>        |  |
| <a href="#">E2F1</a>    | <a href="#">TOP2A</a>  | <a href="#">0.09072524</a>  | <a href="#">Pathway</a>               | <a href="#">REACTOME</a>        |  |
| <a href="#">E2F1</a>    | <a href="#">CDC25A</a> | <a href="#">0.07906834</a>  | <a href="#">Pathway</a>               | <a href="#">REACTOME</a>        |  |
| <a href="#">VPS4A</a>   | <a href="#">VPS4B</a>  | <a href="#">0.18933201</a>  | <a href="#">Pathway</a>               | <a href="#">REACTOME</a>        |  |
| <a href="#">VPS4A</a>   | <a href="#">VTA1</a>   | <a href="#">0.21876583</a>  | <a href="#">Pathway</a>               | <a href="#">REACTOME</a>        |  |
| <a href="#">LIN54</a>   | <a href="#">LIN9</a>   | <a href="#">0.37796447</a>  | <a href="#">Physical Interactions</a> | <a href="#">Schins-Peters-2</a> |  |
| <a href="#">LIN52</a>   | <a href="#">LIN54</a>  | <a href="#">0.37796447</a>  | <a href="#">Physical Interactions</a> | <a href="#">Schins-Peters-2</a> |  |
| <a href="#">LIN37</a>   | <a href="#">LIN54</a>  | <a href="#">0.37796447</a>  | <a href="#">Physical Interactions</a> | <a href="#">Schins-Peters-2</a> |  |
| <a href="#">MYBL1</a>   | <a href="#">LIN54</a>  | <a href="#">0.37796447</a>  | <a href="#">Physical Interactions</a> | <a href="#">Schins-Peters-2</a> |  |
| <a href="#">L3MBTL2</a> | <a href="#">LIN54</a>  | <a href="#">0.37796447</a>  | <a href="#">Physical Interactions</a> | <a href="#">Schins-Peters-2</a> |  |
| <a href="#">RBBP4</a>   | <a href="#">LIN54</a>  | <a href="#">0.37796447</a>  | <a href="#">Physical Interactions</a> | <a href="#">Schins-Peters-2</a> |  |
| <a href="#">MYBL2</a>   | <a href="#">LIN54</a>  | <a href="#">0.37796447</a>  | <a href="#">Physical Interactions</a> | <a href="#">Schins-Peters-2</a> |  |
| <a href="#">DDB1</a>    | <a href="#">DCAF16</a> | <a href="#">0.19569455</a>  | <a href="#">Physical Interactions</a> | <a href="#">Schins-Peters-2</a> |  |
| <a href="#">MICAL3</a>  | <a href="#">GNAI3</a>  | <a href="#">0.15001437</a>  | <a href="#">Physical Interactions</a> | <a href="#">Schins-Peters-2</a> |  |
| <a href="#">MAU2</a>    | <a href="#">GNAI3</a>  | <a href="#">0.11073357</a>  | <a href="#">Physical Interactions</a> | <a href="#">Schins-Peters-2</a> |  |
| <a href="#">RECQL4</a>  | <a href="#">GNAI3</a>  | <a href="#">0.12551126</a>  | <a href="#">Physical Interactions</a> | <a href="#">Schins-Peters-2</a> |  |

|                        |                       |                             |                                       |                              |  |
|------------------------|-----------------------|-----------------------------|---------------------------------------|------------------------------|--|
| <a href="#">LIN54</a>  | <a href="#">LIN9</a>  | <a href="#">0.060034964</a> | <a href="#">Physical Interactions</a> | <a href="#">REF-reactome</a> |  |
| <a href="#">LIN52</a>  | <a href="#">LIN9</a>  | <a href="#">0.060034964</a> | <a href="#">Physical Interactions</a> | <a href="#">REF-reactome</a> |  |
| <a href="#">LIN52</a>  | <a href="#">LIN54</a> | <a href="#">0.060034964</a> | <a href="#">Physical Interactions</a> | <a href="#">REF-reactome</a> |  |
| <a href="#">LIN37</a>  | <a href="#">LIN9</a>  | <a href="#">0.060034964</a> | <a href="#">Physical Interactions</a> | <a href="#">REF-reactome</a> |  |
| <a href="#">LIN37</a>  | <a href="#">LIN54</a> | <a href="#">0.060034964</a> | <a href="#">Physical Interactions</a> | <a href="#">REF-reactome</a> |  |
| <a href="#">LIN37</a>  | <a href="#">LIN52</a> | <a href="#">0.060034964</a> | <a href="#">Physical Interactions</a> | <a href="#">REF-reactome</a> |  |
| <a href="#">RBBP4</a>  | <a href="#">LIN9</a>  | <a href="#">0.026713608</a> | <a href="#">Physical Interactions</a> | <a href="#">REF-reactome</a> |  |
| <a href="#">RBBP4</a>  | <a href="#">LIN54</a> | <a href="#">0.026713608</a> | <a href="#">Physical Interactions</a> | <a href="#">REF-reactome</a> |  |
| <a href="#">RBBP4</a>  | <a href="#">LIN52</a> | <a href="#">0.026713608</a> | <a href="#">Physical Interactions</a> | <a href="#">REF-reactome</a> |  |
| <a href="#">RBBP4</a>  | <a href="#">LIN37</a> | <a href="#">0.026713608</a> | <a href="#">Physical Interactions</a> | <a href="#">REF-reactome</a> |  |
| <a href="#">MYBL2</a>  | <a href="#">LIN9</a>  | <a href="#">0.075245954</a> | <a href="#">Physical Interactions</a> | <a href="#">REF-reactome</a> |  |
| <a href="#">MYBL2</a>  | <a href="#">LIN54</a> | <a href="#">0.075245954</a> | <a href="#">Physical Interactions</a> | <a href="#">REF-reactome</a> |  |
| <a href="#">MYBL2</a>  | <a href="#">LIN52</a> | <a href="#">0.075245954</a> | <a href="#">Physical Interactions</a> | <a href="#">REF-reactome</a> |  |
| <a href="#">MYBL2</a>  | <a href="#">LIN37</a> | <a href="#">0.075245954</a> | <a href="#">Physical Interactions</a> | <a href="#">REF-reactome</a> |  |
| <a href="#">MYBL2</a>  | <a href="#">RBBP4</a> | <a href="#">0.033482004</a> | <a href="#">Physical Interactions</a> | <a href="#">REF-reactome</a> |  |
| <a href="#">DYRK1A</a> | <a href="#">LIN9</a>  | <a href="#">0.10136444</a>  | <a href="#">Physical Interactions</a> | <a href="#">REF-reactome</a> |  |
| <a href="#">DYRK1A</a> | <a href="#">LIN54</a> | <a href="#">0.10136444</a>  | <a href="#">Physical Interactions</a> | <a href="#">REF-reactome</a> |  |
| <a href="#">DYRK1A</a> | <a href="#">LIN52</a> | <a href="#">0.10136444</a>  | <a href="#">Physical Interactions</a> | <a href="#">REF-reactome</a> |  |



|                        |                       |                             |                                       |                              |  |
|------------------------|-----------------------|-----------------------------|---------------------------------------|------------------------------|--|
| <a href="#">DYRK1A</a> | <a href="#">LIN37</a> | <a href="#">0.10136444</a>  | <a href="#">Physical Interactions</a> | <a href="#">REF-reactome</a> |  |
| <a href="#">DYRK1A</a> | <a href="#">RBBP4</a> | <a href="#">0.045103885</a> | <a href="#">Physical Interactions</a> | <a href="#">REF-reactome</a> |  |
| <a href="#">VTA1</a>   | <a href="#">VPS4B</a> | <a href="#">0.042756777</a> | <a href="#">Physical Interactions</a> | <a href="#">REF-reactome</a> |  |
| <a href="#">TOP2A</a>  | <a href="#">LIN9</a>  | <a href="#">0.10136444</a>  | <a href="#">Physical Interactions</a> | <a href="#">REF-reactome</a> |  |
| <a href="#">TOP2A</a>  | <a href="#">LIN54</a> | <a href="#">0.10136444</a>  | <a href="#">Physical Interactions</a> | <a href="#">REF-reactome</a> |  |
| <a href="#">TOP2A</a>  | <a href="#">LIN52</a> | <a href="#">0.10136444</a>  | <a href="#">Physical Interactions</a> | <a href="#">REF-reactome</a> |  |
| <a href="#">TOP2A</a>  | <a href="#">LIN37</a> | <a href="#">0.10136444</a>  | <a href="#">Physical Interactions</a> | <a href="#">REF-reactome</a> |  |
| <a href="#">TOP2A</a>  | <a href="#">RBBP4</a> | <a href="#">0.045103885</a> | <a href="#">Physical Interactions</a> | <a href="#">REF-reactome</a> |  |
| <a href="#">RBL1</a>   | <a href="#">LIN9</a>  | <a href="#">0.058857713</a> | <a href="#">Physical Interactions</a> | <a href="#">REF-reactome</a> |  |
| <a href="#">RBL1</a>   | <a href="#">LIN54</a> | <a href="#">0.058857713</a> | <a href="#">Physical Interactions</a> | <a href="#">REF-reactome</a> |  |
| <a href="#">RBL1</a>   | <a href="#">LIN52</a> | <a href="#">0.058857713</a> | <a href="#">Physical Interactions</a> | <a href="#">REF-reactome</a> |  |
| <a href="#">RBL1</a>   | <a href="#">LIN37</a> | <a href="#">0.058857713</a> | <a href="#">Physical Interactions</a> | <a href="#">REF-reactome</a> |  |
| <a href="#">RBL1</a>   | <a href="#">RBBP4</a> | <a href="#">0.026189769</a> | <a href="#">Physical Interactions</a> | <a href="#">REF-reactome</a> |  |
| <a href="#">RBL1</a>   | <a href="#">MYBL2</a> | <a href="#">0.073770426</a> | <a href="#">Physical Interactions</a> | <a href="#">REF-reactome</a> |  |
| <a href="#">CDC25A</a> | <a href="#">LIN9</a>  | <a href="#">0.018863164</a> | <a href="#">Physical Interactions</a> | <a href="#">REF-reactome</a> |  |
| <a href="#">CDC25A</a> | <a href="#">LIN54</a> | <a href="#">0.018863164</a> | <a href="#">Physical Interactions</a> | <a href="#">REF-reactome</a> |  |
| <a href="#">CDC25A</a> | <a href="#">LIN52</a> | <a href="#">0.018863164</a> | <a href="#">Physical Interactions</a> | <a href="#">REF-reactome</a> |  |
| <a href="#">CDC25A</a> | <a href="#">LIN37</a> | <a href="#">0.018863164</a> | <a href="#">Physical Interactions</a> | <a href="#">REF-reactome</a> |  |

|                        |                       |                              |                                       |                                 |  |
|------------------------|-----------------------|------------------------------|---------------------------------------|---------------------------------|--|
| <a href="#">CDC25A</a> | <a href="#">RBBP4</a> | <a href="#">0.008393494</a>  | <a href="#">Physical Interactions</a> | <a href="#">REF-reactome</a>    |  |
| <a href="#">E2F1</a>   | <a href="#">LIN9</a>  | <a href="#">0.03446678</a>   | <a href="#">Physical Interactions</a> | <a href="#">REF-reactome</a>    |  |
| <a href="#">E2F1</a>   | <a href="#">LIN54</a> | <a href="#">0.03446678</a>   | <a href="#">Physical Interactions</a> | <a href="#">REF-reactome</a>    |  |
| <a href="#">E2F1</a>   | <a href="#">LIN52</a> | <a href="#">0.03446678</a>   | <a href="#">Physical Interactions</a> | <a href="#">REF-reactome</a>    |  |
| <a href="#">E2F1</a>   | <a href="#">LIN37</a> | <a href="#">0.03446678</a>   | <a href="#">Physical Interactions</a> | <a href="#">REF-reactome</a>    |  |
| <a href="#">E2F1</a>   | <a href="#">RBBP4</a> | <a href="#">0.0153365955</a> | <a href="#">Physical Interactions</a> | <a href="#">REF-reactome</a>    |  |
| <a href="#">E2F1</a>   | <a href="#">RBL1</a>  | <a href="#">0.033790905</a>  | <a href="#">Physical Interactions</a> | <a href="#">REF-reactome</a>    |  |
| <a href="#">VPS4A</a>  | <a href="#">VPS4B</a> | <a href="#">0.042756777</a>  | <a href="#">Physical Interactions</a> | <a href="#">REF-reactome</a>    |  |
| <a href="#">VPS4A</a>  | <a href="#">VTA1</a>  | <a href="#">0.042756777</a>  | <a href="#">Physical Interactions</a> | <a href="#">REF-reactome</a>    |  |
| <a href="#">LIN54</a>  | <a href="#">LIN9</a>  | <a href="#">0.060034964</a>  | <a href="#">Physical Interactions</a> | <a href="#">astrik-Stein-20</a> |  |
| <a href="#">LIN52</a>  | <a href="#">LIN9</a>  | <a href="#">0.060034964</a>  | <a href="#">Physical Interactions</a> | <a href="#">astrik-Stein-20</a> |  |
| <a href="#">LIN52</a>  | <a href="#">LIN54</a> | <a href="#">0.060034964</a>  | <a href="#">Physical Interactions</a> | <a href="#">astrik-Stein-20</a> |  |
| <a href="#">LIN37</a>  | <a href="#">LIN9</a>  | <a href="#">0.060034964</a>  | <a href="#">Physical Interactions</a> | <a href="#">astrik-Stein-20</a> |  |
| <a href="#">LIN37</a>  | <a href="#">LIN54</a> | <a href="#">0.060034964</a>  | <a href="#">Physical Interactions</a> | <a href="#">astrik-Stein-20</a> |  |
| <a href="#">LIN37</a>  | <a href="#">LIN52</a> | <a href="#">0.060034964</a>  | <a href="#">Physical Interactions</a> | <a href="#">astrik-Stein-20</a> |  |
| <a href="#">RBBP4</a>  | <a href="#">LIN9</a>  | <a href="#">0.026713608</a>  | <a href="#">Physical Interactions</a> | <a href="#">astrik-Stein-20</a> |  |
| <a href="#">RBBP4</a>  | <a href="#">LIN54</a> | <a href="#">0.026713608</a>  | <a href="#">Physical Interactions</a> | <a href="#">astrik-Stein-20</a> |  |
| <a href="#">RBBP4</a>  | <a href="#">LIN52</a> | <a href="#">0.026713608</a>  | <a href="#">Physical Interactions</a> | <a href="#">astrik-Stein-20</a> |  |

|                        |                       |                             |                                       |                                 |  |
|------------------------|-----------------------|-----------------------------|---------------------------------------|---------------------------------|--|
| <a href="#">RBBP4</a>  | <a href="#">LIN37</a> | <a href="#">0.026713608</a> | <a href="#">Physical Interactions</a> | <a href="#">astrik-Stein-20</a> |  |
| <a href="#">MYBL2</a>  | <a href="#">LIN9</a>  | <a href="#">0.075245954</a> | <a href="#">Physical Interactions</a> | <a href="#">astrik-Stein-20</a> |  |
| <a href="#">MYBL2</a>  | <a href="#">LIN54</a> | <a href="#">0.075245954</a> | <a href="#">Physical Interactions</a> | <a href="#">astrik-Stein-20</a> |  |
| <a href="#">MYBL2</a>  | <a href="#">LIN52</a> | <a href="#">0.075245954</a> | <a href="#">Physical Interactions</a> | <a href="#">astrik-Stein-20</a> |  |
| <a href="#">MYBL2</a>  | <a href="#">LIN37</a> | <a href="#">0.075245954</a> | <a href="#">Physical Interactions</a> | <a href="#">astrik-Stein-20</a> |  |
| <a href="#">MYBL2</a>  | <a href="#">RBBP4</a> | <a href="#">0.033482004</a> | <a href="#">Physical Interactions</a> | <a href="#">astrik-Stein-20</a> |  |
| <a href="#">DYRK1A</a> | <a href="#">LIN9</a>  | <a href="#">0.10136444</a>  | <a href="#">Physical Interactions</a> | <a href="#">astrik-Stein-20</a> |  |
| <a href="#">DYRK1A</a> | <a href="#">LIN54</a> | <a href="#">0.10136444</a>  | <a href="#">Physical Interactions</a> | <a href="#">astrik-Stein-20</a> |  |
| <a href="#">DYRK1A</a> | <a href="#">LIN52</a> | <a href="#">0.10136444</a>  | <a href="#">Physical Interactions</a> | <a href="#">astrik-Stein-20</a> |  |
| <a href="#">DYRK1A</a> | <a href="#">LIN37</a> | <a href="#">0.10136444</a>  | <a href="#">Physical Interactions</a> | <a href="#">astrik-Stein-20</a> |  |
| <a href="#">DYRK1A</a> | <a href="#">RBBP4</a> | <a href="#">0.045103885</a> | <a href="#">Physical Interactions</a> | <a href="#">astrik-Stein-20</a> |  |
| <a href="#">VTA1</a>   | <a href="#">VPS4B</a> | <a href="#">0.042756777</a> | <a href="#">Physical Interactions</a> | <a href="#">astrik-Stein-20</a> |  |
| <a href="#">TOP2A</a>  | <a href="#">LIN9</a>  | <a href="#">0.10136444</a>  | <a href="#">Physical Interactions</a> | <a href="#">astrik-Stein-20</a> |  |
| <a href="#">TOP2A</a>  | <a href="#">LIN54</a> | <a href="#">0.10136444</a>  | <a href="#">Physical Interactions</a> | <a href="#">astrik-Stein-20</a> |  |
| <a href="#">TOP2A</a>  | <a href="#">LIN52</a> | <a href="#">0.10136444</a>  | <a href="#">Physical Interactions</a> | <a href="#">astrik-Stein-20</a> |  |
| <a href="#">TOP2A</a>  | <a href="#">LIN37</a> | <a href="#">0.10136444</a>  | <a href="#">Physical Interactions</a> | <a href="#">astrik-Stein-20</a> |  |
| <a href="#">TOP2A</a>  | <a href="#">RBBP4</a> | <a href="#">0.045103885</a> | <a href="#">Physical Interactions</a> | <a href="#">astrik-Stein-20</a> |  |
| <a href="#">RBL1</a>   | <a href="#">LIN9</a>  | <a href="#">0.058857713</a> | <a href="#">Physical Interactions</a> | <a href="#">astrik-Stein-20</a> |  |

|                        |                       |                              |                                       |                                 |  |
|------------------------|-----------------------|------------------------------|---------------------------------------|---------------------------------|--|
| <a href="#">RBL1</a>   | <a href="#">LIN54</a> | <a href="#">0.058857713</a>  | <a href="#">Physical Interactions</a> | <a href="#">astrik-Stein-20</a> |  |
| <a href="#">RBL1</a>   | <a href="#">LIN52</a> | <a href="#">0.058857713</a>  | <a href="#">Physical Interactions</a> | <a href="#">astrik-Stein-20</a> |  |
| <a href="#">RBL1</a>   | <a href="#">LIN37</a> | <a href="#">0.058857713</a>  | <a href="#">Physical Interactions</a> | <a href="#">astrik-Stein-20</a> |  |
| <a href="#">RBL1</a>   | <a href="#">RBBP4</a> | <a href="#">0.026189769</a>  | <a href="#">Physical Interactions</a> | <a href="#">astrik-Stein-20</a> |  |
| <a href="#">RBL1</a>   | <a href="#">MYBL2</a> | <a href="#">0.073770426</a>  | <a href="#">Physical Interactions</a> | <a href="#">astrik-Stein-20</a> |  |
| <a href="#">CDC25A</a> | <a href="#">LIN9</a>  | <a href="#">0.018863164</a>  | <a href="#">Physical Interactions</a> | <a href="#">astrik-Stein-20</a> |  |
| <a href="#">CDC25A</a> | <a href="#">LIN54</a> | <a href="#">0.018863164</a>  | <a href="#">Physical Interactions</a> | <a href="#">astrik-Stein-20</a> |  |
| <a href="#">CDC25A</a> | <a href="#">LIN52</a> | <a href="#">0.018863164</a>  | <a href="#">Physical Interactions</a> | <a href="#">astrik-Stein-20</a> |  |
| <a href="#">CDC25A</a> | <a href="#">LIN37</a> | <a href="#">0.018863164</a>  | <a href="#">Physical Interactions</a> | <a href="#">astrik-Stein-20</a> |  |
| <a href="#">CDC25A</a> | <a href="#">RBBP4</a> | <a href="#">0.008393494</a>  | <a href="#">Physical Interactions</a> | <a href="#">astrik-Stein-20</a> |  |
| <a href="#">E2F1</a>   | <a href="#">LIN9</a>  | <a href="#">0.03446678</a>   | <a href="#">Physical Interactions</a> | <a href="#">astrik-Stein-20</a> |  |
| <a href="#">E2F1</a>   | <a href="#">LIN54</a> | <a href="#">0.03446678</a>   | <a href="#">Physical Interactions</a> | <a href="#">astrik-Stein-20</a> |  |
| <a href="#">E2F1</a>   | <a href="#">LIN52</a> | <a href="#">0.03446678</a>   | <a href="#">Physical Interactions</a> | <a href="#">astrik-Stein-20</a> |  |
| <a href="#">E2F1</a>   | <a href="#">LIN37</a> | <a href="#">0.03446678</a>   | <a href="#">Physical Interactions</a> | <a href="#">astrik-Stein-20</a> |  |
| <a href="#">E2F1</a>   | <a href="#">RBBP4</a> | <a href="#">0.0153365955</a> | <a href="#">Physical Interactions</a> | <a href="#">astrik-Stein-20</a> |  |
| <a href="#">E2F1</a>   | <a href="#">RBL1</a>  | <a href="#">0.033790905</a>  | <a href="#">Physical Interactions</a> | <a href="#">astrik-Stein-20</a> |  |
| <a href="#">VPS4A</a>  | <a href="#">VPS4B</a> | <a href="#">0.042756777</a>  | <a href="#">Physical Interactions</a> | <a href="#">astrik-Stein-20</a> |  |
| <a href="#">VPS4A</a>  | <a href="#">VTA1</a>  | <a href="#">0.042756777</a>  | <a href="#">Physical Interactions</a> | <a href="#">astrik-Stein-20</a> |  |

|                       |                        |                             |                                       |                             |  |
|-----------------------|------------------------|-----------------------------|---------------------------------------|-----------------------------|--|
| <a href="#">LIN54</a> | <a href="#">LIN9</a>   | <a href="#">0.10755723</a>  | <a href="#">Physical Interactions</a> | <a href="#">SMALL-SCALE</a> |  |
| <a href="#">LIN52</a> | <a href="#">LIN9</a>   | <a href="#">0.15971665</a>  | <a href="#">Physical Interactions</a> | <a href="#">SMALL-SCALE</a> |  |
| <a href="#">LIN52</a> | <a href="#">LIN54</a>  | <a href="#">0.15396184</a>  | <a href="#">Physical Interactions</a> | <a href="#">SMALL-SCALE</a> |  |
| <a href="#">LIN37</a> | <a href="#">LIN9</a>   | <a href="#">0.10612605</a>  | <a href="#">Physical Interactions</a> | <a href="#">SMALL-SCALE</a> |  |
| <a href="#">LIN37</a> | <a href="#">LIN54</a>  | <a href="#">0.10230218</a>  | <a href="#">Physical Interactions</a> | <a href="#">SMALL-SCALE</a> |  |
| <a href="#">LIN37</a> | <a href="#">LIN52</a>  | <a href="#">0.15191317</a>  | <a href="#">Physical Interactions</a> | <a href="#">SMALL-SCALE</a> |  |
| <a href="#">MYBL1</a> | <a href="#">LIN9</a>   | <a href="#">0.17815623</a>  | <a href="#">Physical Interactions</a> | <a href="#">SMALL-SCALE</a> |  |
| <a href="#">MYBL1</a> | <a href="#">LIN54</a>  | <a href="#">0.171737</a>    | <a href="#">Physical Interactions</a> | <a href="#">SMALL-SCALE</a> |  |
| <a href="#">MYBL1</a> | <a href="#">LIN37</a>  | <a href="#">0.16945182</a>  | <a href="#">Physical Interactions</a> | <a href="#">SMALL-SCALE</a> |  |
| <a href="#">RBBP4</a> | <a href="#">LIN9</a>   | <a href="#">0.021426795</a> | <a href="#">Physical Interactions</a> | <a href="#">SMALL-SCALE</a> |  |
| <a href="#">RBBP4</a> | <a href="#">RNF138</a> | <a href="#">0.02764963</a>  | <a href="#">Physical Interactions</a> | <a href="#">SMALL-SCALE</a> |  |
| <a href="#">RBBP4</a> | <a href="#">LIN54</a>  | <a href="#">0.020654757</a> | <a href="#">Physical Interactions</a> | <a href="#">SMALL-SCALE</a> |  |
| <a href="#">RBBP4</a> | <a href="#">LIN52</a>  | <a href="#">0.030671189</a> | <a href="#">Physical Interactions</a> | <a href="#">SMALL-SCALE</a> |  |
| <a href="#">RBBP4</a> | <a href="#">LIN37</a>  | <a href="#">0.020379918</a> | <a href="#">Physical Interactions</a> | <a href="#">SMALL-SCALE</a> |  |
| <a href="#">MYBL2</a> | <a href="#">LIN9</a>   | <a href="#">0.064028874</a> | <a href="#">Physical Interactions</a> | <a href="#">SMALL-SCALE</a> |  |
| <a href="#">MYBL2</a> | <a href="#">LIN54</a>  | <a href="#">0.06172182</a>  | <a href="#">Physical Interactions</a> | <a href="#">SMALL-SCALE</a> |  |
| <a href="#">MYBL2</a> | <a href="#">LIN52</a>  | <a href="#">0.09165355</a>  | <a href="#">Physical Interactions</a> | <a href="#">SMALL-SCALE</a> |  |
| <a href="#">MYBL2</a> | <a href="#">LIN37</a>  | <a href="#">0.06090053</a>  | <a href="#">Physical Interactions</a> | <a href="#">SMALL-SCALE</a> |  |

|                        |                        |                              |                                       |                             |  |
|------------------------|------------------------|------------------------------|---------------------------------------|-----------------------------|--|
| <a href="#">MYBL2</a>  | <a href="#">RBBP4</a>  | <a href="#">0.012295785</a>  | <a href="#">Physical Interactions</a> | <a href="#">SMALL-SCALE</a> |  |
| <a href="#">DYRK1A</a> | <a href="#">LIN52</a>  | <a href="#">0.06960841</a>   | <a href="#">Physical Interactions</a> | <a href="#">SMALL-SCALE</a> |  |
| <a href="#">DDB1</a>   | <a href="#">DCAF16</a> | <a href="#">0.041741073</a>  | <a href="#">Physical Interactions</a> | <a href="#">SMALL-SCALE</a> |  |
| <a href="#">DDB1</a>   | <a href="#">MYO6</a>   | <a href="#">0.0045392253</a> | <a href="#">Physical Interactions</a> | <a href="#">SMALL-SCALE</a> |  |
| <a href="#">DDB1</a>   | <a href="#">RBBP4</a>  | <a href="#">0.0025839908</a> | <a href="#">Physical Interactions</a> | <a href="#">SMALL-SCALE</a> |  |
| <a href="#">RECQL4</a> | <a href="#">DDB1</a>   | <a href="#">0.007584225</a>  | <a href="#">Physical Interactions</a> | <a href="#">SMALL-SCALE</a> |  |
| <a href="#">TOP2A</a>  | <a href="#">NSD2</a>   | <a href="#">0.00819744</a>   | <a href="#">Physical Interactions</a> | <a href="#">SMALL-SCALE</a> |  |
| <a href="#">RBL1</a>   | <a href="#">LIN9</a>   | <a href="#">0.039356906</a>  | <a href="#">Physical Interactions</a> | <a href="#">SMALL-SCALE</a> |  |
| <a href="#">RBL1</a>   | <a href="#">LIN54</a>  | <a href="#">0.037938822</a>  | <a href="#">Physical Interactions</a> | <a href="#">SMALL-SCALE</a> |  |
| <a href="#">RBL1</a>   | <a href="#">LIN52</a>  | <a href="#">0.056337085</a>  | <a href="#">Physical Interactions</a> | <a href="#">SMALL-SCALE</a> |  |
| <a href="#">RBL1</a>   | <a href="#">LIN37</a>  | <a href="#">0.037433993</a>  | <a href="#">Physical Interactions</a> | <a href="#">SMALL-SCALE</a> |  |
| <a href="#">RBL1</a>   | <a href="#">MYBL2</a>  | <a href="#">0.022584995</a>  | <a href="#">Physical Interactions</a> | <a href="#">SMALL-SCALE</a> |  |
| <a href="#">RBL1</a>   | <a href="#">DYRK1A</a> | <a href="#">0.0171527</a>    | <a href="#">Physical Interactions</a> | <a href="#">SMALL-SCALE</a> |  |
| <a href="#">RNF111</a> | <a href="#">ESRP1</a>  | <a href="#">0.2635499</a>    | <a href="#">Physical Interactions</a> | <a href="#">SMALL-SCALE</a> |  |
| <a href="#">E2F1</a>   | <a href="#">RBBP4</a>  | <a href="#">0.004274237</a>  | <a href="#">Physical Interactions</a> | <a href="#">SMALL-SCALE</a> |  |
| <a href="#">E2F1</a>   | <a href="#">MYBL2</a>  | <a href="#">0.012772539</a>  | <a href="#">Physical Interactions</a> | <a href="#">SMALL-SCALE</a> |  |
| <a href="#">E2F1</a>   | <a href="#">DDB1</a>   | <a href="#">0.0026841816</a> | <a href="#">Physical Interactions</a> | <a href="#">SMALL-SCALE</a> |  |
| <a href="#">E2F1</a>   | <a href="#">RBL1</a>   | <a href="#">0.007850952</a>  | <a href="#">Physical Interactions</a> | <a href="#">SMALL-SCALE</a> |  |

|                         |                       |                             |                                       |                                |  |
|-------------------------|-----------------------|-----------------------------|---------------------------------------|--------------------------------|--|
| <a href="#">VPS4A</a>   | <a href="#">VPS4B</a> | <a href="#">0.13337156</a>  | <a href="#">Physical Interactions</a> | <a href="#">SMALL-SCAL</a>     |  |
| <a href="#">VPS4A</a>   | <a href="#">VTA1</a>  | <a href="#">0.11032041</a>  | <a href="#">Physical Interactions</a> | <a href="#">SMALL-SCAL</a>     |  |
| <a href="#">LIN54</a>   | <a href="#">LIN9</a>  | <a href="#">0.076002054</a> | <a href="#">Physical Interactions</a> | <a href="#">ttlin-Harper-2</a> |  |
| <a href="#">LIN52</a>   | <a href="#">LIN9</a>  | <a href="#">0.14680636</a>  | <a href="#">Physical Interactions</a> | <a href="#">ttlin-Harper-2</a> |  |
| <a href="#">LIN37</a>   | <a href="#">LIN9</a>  | <a href="#">0.073395744</a> | <a href="#">Physical Interactions</a> | <a href="#">ttlin-Harper-2</a> |  |
| <a href="#">LIN37</a>   | <a href="#">LIN54</a> | <a href="#">0.13336256</a>  | <a href="#">Physical Interactions</a> | <a href="#">ttlin-Harper-2</a> |  |
| <a href="#">LIN37</a>   | <a href="#">LIN52</a> | <a href="#">0.2576045</a>   | <a href="#">Physical Interactions</a> | <a href="#">ttlin-Harper-2</a> |  |
| <a href="#">MYBL1</a>   | <a href="#">LIN9</a>  | <a href="#">0.11752817</a>  | <a href="#">Physical Interactions</a> | <a href="#">ttlin-Harper-2</a> |  |
| <a href="#">MYBL1</a>   | <a href="#">LIN54</a> | <a href="#">0.21355268</a>  | <a href="#">Physical Interactions</a> | <a href="#">ttlin-Harper-2</a> |  |
| <a href="#">MYBL1</a>   | <a href="#">LIN52</a> | <a href="#">0.4125006</a>   | <a href="#">Physical Interactions</a> | <a href="#">ttlin-Harper-2</a> |  |
| <a href="#">MYBL1</a>   | <a href="#">LIN37</a> | <a href="#">0.2062294</a>   | <a href="#">Physical Interactions</a> | <a href="#">ttlin-Harper-2</a> |  |
| <a href="#">L3MBTL2</a> | <a href="#">LIN54</a> | <a href="#">0.058416527</a> | <a href="#">Physical Interactions</a> | <a href="#">ttlin-Harper-2</a> |  |
| <a href="#">RBBP4</a>   | <a href="#">LIN9</a>  | <a href="#">0.058296047</a> | <a href="#">Physical Interactions</a> | <a href="#">ttlin-Harper-2</a> |  |
| <a href="#">RBBP4</a>   | <a href="#">LIN37</a> | <a href="#">0.102293424</a> | <a href="#">Physical Interactions</a> | <a href="#">ttlin-Harper-2</a> |  |
| <a href="#">MYBL2</a>   | <a href="#">LIN9</a>  | <a href="#">0.21832462</a>  | <a href="#">Physical Interactions</a> | <a href="#">ttlin-Harper-2</a> |  |
| <a href="#">MYBL2</a>   | <a href="#">LIN37</a> | <a href="#">0.38309926</a>  | <a href="#">Physical Interactions</a> | <a href="#">ttlin-Harper-2</a> |  |
| <a href="#">VTA1</a>    | <a href="#">VPS4B</a> | <a href="#">0.17564446</a>  | <a href="#">Physical Interactions</a> | <a href="#">ttlin-Harper-2</a> |  |
| <a href="#">VPS4A</a>   | <a href="#">VPS4B</a> | <a href="#">0.24025449</a>  | <a href="#">Physical Interactions</a> | <a href="#">ttlin-Harper-2</a> |  |

|                        |                       |                              |                                        |                                |  |
|------------------------|-----------------------|------------------------------|----------------------------------------|--------------------------------|--|
| <a href="#">VPS4A</a>  | <a href="#">VTA1</a>  | <a href="#">0.1835753</a>    | <a href="#">Physical Interactions</a>  | <a href="#">ttlin-Harper-2</a> |  |
| <a href="#">CNOT4</a>  | <a href="#">CPEB3</a> | <a href="#">0.0057032723</a> | <a href="#">Shared protein domains</a> | <a href="#">PFAM</a>           |  |
| <a href="#">PLAGL2</a> | <a href="#">OVOL1</a> | <a href="#">0.004378151</a>  | <a href="#">Shared protein domains</a> | <a href="#">PFAM</a>           |  |
| <a href="#">PTBP3</a>  | <a href="#">CNOT4</a> | <a href="#">0.005712123</a>  | <a href="#">Shared protein domains</a> | <a href="#">PFAM</a>           |  |
| <a href="#">MYBL2</a>  | <a href="#">MYBL1</a> | <a href="#">0.09841619</a>   | <a href="#">Shared protein domains</a> | <a href="#">PFAM</a>           |  |
| <a href="#">VPS4A</a>  | <a href="#">VPS4B</a> | <a href="#">0.04795295</a>   | <a href="#">Shared protein domains</a> | <a href="#">PFAM</a>           |  |
